# Supplementary material for: NARD: whole-genome reference panel of 1779 Northeast Asians improves imputation accuracy of rare and low-frequency variants
Source: Genome Med. 2019 Oct 22;11:64. doi: 10.1186/s13073-019-0677-z (PMC6805399; doi:10.1186/s13073-019-0677-z)
Supplement: Supplementary file 2 — Additional file 2: Table S1. Variant statistics. Table S2. Variant accuracy. Table S3. Data source for imputation analysis. Table S4. Imputation performance according to types of reference panel. [file 13073_2019_677_MOESM2_ESM.xlsx]

## Sheet: Table S1
Table S1. Variant statistics.
Sample ID	Population	Mean depth (X)	Number of SNP	Number of Indel
HG00525	CHN	64.9184	3282538	317728
HG00690	CHN	66.1653	3289769	318148
NA18592	CHN	75.3668	3296977	317509
HG00542	CHN	61.0161	3298131	318488
HG00448	CHN	71.3074	3302057	318462
HG00428	CHN	60.6186	3302251	317875
HG00699	CHN	90.6914	3302483	319428
HG00421	CHN	60.3338	3302855	319088
HG00672	CHN	75.9558	3303412	318675
HG00530	CHN	62.7556	3304925	319761
HG00479	CHN	66.3425	3305152	319008
HG00698	CHN	75.2388	3305253	318657
HG00556	CHN	57.1985	3305602	317793
HG00657	CHN	77.1346	3306043	319572
HG00620	CHN	68.3979	3307036	319423
HG00442	CHN	61.1543	3307155	317036
HG00500	CHN	63.0459	3308346	319635
HG00531	CHN	64.565	3308723	318304
HG00683	CHN	68.3588	3309229	319026
HG00619	CHN	67.1654	3310064	318332
HG00584	CHN	65.5681	3310473	318962
NA18545	CHN	74.1031	3310534	319318
HG00663	CHN	68.2719	3311636	319774
NA18608	CHN	69.0311	3311800	318835
HG00533	CHN	64.327	3311921	318590
NA18540	CHN	76.151	3312989	317738
HG00513	CHN	66.7357	3314377	318283
HG00478	CHN	63.485	3314856	317672
HG00422	CHN	59.9977	3315151	320165
HG00524	CHN	62.2513	3315674	319549
HG00418	CHN	61.8425	3317068	322120
HG00443	CHN	66.0536	3317643	319625
NA18620	CHN	70.7496	3318195	319043
NA18532	CHN	73.4947	3318464	319320
HG00476	CHN	63.2098	3318546	318000
HG00437	CHN	62.7548	3318698	319634
NA18609	CHN	69.7765	3318740	319569
HG00473	CHN	67.1673	3319639	320888
HG00472	CHN	66.5813	3320412	318966
NA18593	CHN	75.4526	3320538	320312
HG00436	CHN	60.6857	3320662	319709
HG00583	CHN	71.2379	3322341	318646
HG00475	CHN	60.755	3322836	318989
HG00684	CHN	69.6562	3322958	319549
HG00536	CHN	65.3593	3323390	319323
NA18566	CHN	77.7513	3323668	319398
NA18542	CHN	76.03	3323859	321297
YH_cell_line	CHN	60.7666	3324323	318639
HG00653	CHN	65.7246	3324485	318510
NA18603	CHN	68.8004	3325893	321019
NA18537	CHN	78.3473	3326148	319897
HG00557	CHN	54.8083	3326309	319443
NA18582	CHN	83.1718	3327324	320040
HG00656	CHN	69.4643	3327753	318993
NA18526	CHN	76.6495	3327834	320900
NA18555	CHN	83.335	3328253	318819
HG00580	CHN	59.3199	3328766	320731
NA18624	CHN	75.1159	3329240	320990
NA18621	CHN	75.4288	3329766	320731
NA18570	CHN	71.5571	3329877	320392
NA18571	CHN	79.0299	3330689	318402
NA18564	CHN	81.0111	3331661	320291
NA18562	CHN	72.1905	3331889	320877
NA18612	CHN	76.7584	3332331	320145
NA18577	CHN	74.2532	3332606	318723
NA18633	CHN	77.3648	3332843	320747
NA18558	CHN	76.5796	3333265	319069
NA18552	CHN	76.5543	3333312	320323
NA18573	CHN	75.1079	3334331	320863
HG00671	CHN	59.2982	3334563	319586
NA18622	CHN	74.527	3335009	318110
HG00427	CHN	62.6449	3335256	322672
NA18547	CHN	78.8258	3335309	320340
HG00534	CHN	65.953	3337756	320115
NA18529	CHN	71.5084	3337830	321063
NA18632	CHN	74.4027	3338988	320286
NA18611	CHN	68.4388	3340540	320257
NA18572	CHN	74.4501	3340740	319694
NA18623	CHN	71.2711	3340926	321376
NA18579	CHN	75.8159	3341338	320402
NA18605	CHN	70.6311	3343284	320164
NA18636	CHN	75.9857	3343880	321288
NA18524	CHN	83.6097	3345402	319250
NA18550	CHN	80.0469	3346830	320275
NA18635	CHN	79.073	3348323	319603
NA18594	CHN	80.23	3349044	321799
NA18563	CHN	81.0877	3350436	320706
NA18576	CHN	74.2668	3351250	320954
NA18561	CHN	73.2932	3352494	320092
NA18637	CHN	77.7436	3367063	321395
HG00537	CHN	67.6489	3382636	327163
HKG01	HKG	77.3596	3319805	324158
HKG02	HKG	74.7325	3319728	321509
HKG03	HKG	73.1095	3285663	323114
HKG04	HKG	69.7431	3293749	320085
HKG05	HKG	69.6534	3326983	322086
HKG06	HKG	69.6203	3314718	319555
HKG07	HKG	69.0425	3327305	325035
HKG08	HKG	68.8666	3334145	323951
HKG09	HKG	68.8533	3301409	321968
HKG10	HKG	68.3184	3292144	323236
HKG11	HKG	67.9319	3321027	323798
HKG12	HKG	67.5834	3318322	322800
HKG13	HKG	67.225	3321895	322910
HKG14	HKG	67.0503	3308748	322647
HKG15	HKG	66.9359	3299803	320386
HKG16	HKG	66.7608	3322511	323399
HKG17	HKG	66.63	3313411	321942
HKG18	HKG	66.513	3302526	321239
HKG19	HKG	66.3854	3331565	324148
HKG20	HKG	64.3686	3326657	321311
HKG21	HKG	64.1833	3342039	325685
HKG22	HKG	63.9763	3306278	319146
HKG23	HKG	63.4635	3305856	320653
HKG24	HKG	62.6463	3313420	327048
HKG25	HKG	62.3212	3328124	326995
HKG26	HKG	62.0583	3315927	321332
HKG27	HKG	61.4809	3314607	321011
HKG28	HKG	59.7791	3329068	326765
HKG29	HKG	59.465	3333771	320989
HKG30	HKG	58.7093	3322464	320997
HKG31	HKG	57.9865	3331523	327154
HKG32	HKG	57.9081	3323673	319825
HKG33	HKG	57.6004	3303380	319901
HKG34	HKG	44.3761	3336218	321783
HKG35	HKG	43.981	3329944	320478
HKG36	HKG	43.2435	3327905	322223
HKG37	HKG	43.1792	3317561	320643
HKG38	HKG	43.0676	3313142	320878
HKG39	HKG	42.6266	3316572	323892
HKG40	HKG	42.4804	3327032	320314
HKG41	HKG	42.4056	3323915	320956
HKG42	HKG	42.1446	3311367	318850
HKG43	HKG	42.0065	3305860	322740
HKG44	HKG	41.8689	3293664	321773
HKG45	HKG	41.7922	3329359	323676
HKG46	HKG	41.6035	3309111	321407
HKG47	HKG	41.2909	3340775	322647
HKG48	HKG	41.0793	3312814	319680
HKG49	HKG	41.0419	3306734	322424
HKG50	HKG	40.8662	3308157	320533
HKG51	HKG	40.723	3319584	319882
HKG52	HKG	40.5805	3320264	323091
HKG53	HKG	40.4707	3304306	323851
HKG54	HKG	40.4326	3293900	320014
HKG55	HKG	40.2084	3308558	321108
HKG56	HKG	39.6029	3329338	321445
HKG57	HKG	39.4935	3331531	321567
HKG58	HKG	39.2204	3335207	321932
JPN01	JPN	21.2383	3331680	323933
JPN02	JPN	18.9618	3321328	323385
JPN03	JPN	18.6402	3312154	324107
JPN04	JPN	18.5614	3286233	319663
JPN05	JPN	18.5276	3316844	322808
JPN06	JPN	18.4778	3312754	324645
JPN07	JPN	18.3926	3288413	321881
JPN08	JPN	18.3696	3282687	319354
JPN09	JPN	18.3684	3320807	322260
JPN10	JPN	18.1651	3312047	324531
JPN11	JPN	18.0934	3288733	323138
JPN12	JPN	18.0291	3326650	323026
JPN13	JPN	17.9981	3318191	323104
JPN14	JPN	17.8853	3331370	325078
JPN15	JPN	17.8816	3300578	322060
JPN16	JPN	17.7361	3310413	322669
JPN17	JPN	17.724	3308772	322253
JPN18	JPN	17.6997	3315253	321877
JPN19	JPN	17.665	3302996	321076
JPN20	JPN	17.6616	3325112	322554
JPN21	JPN	17.6533	3282694	321313
JPN22	JPN	17.6528	3325645	323017
JPN23	JPN	17.53	3322560	322521
JPN24	JPN	17.4738	3322682	325468
JPN25	JPN	17.4601	3290420	321277
JPN26	JPN	17.4341	3307374	321143
JPN27	JPN	17.4184	3310803	321317
JPN28	JPN	17.3208	3290141	320489
JPN29	JPN	17.2759	3295274	324398
JPN30	JPN	17.2605	3313679	322723
JPN31	JPN	17.2463	3320650	322519
JPN32	JPN	17.2206	3307836	323699
JPN33	JPN	17.2065	3304342	322552
JPN34	JPN	17.1756	3298998	321950
JPN35	JPN	17.1719	3310451	324373
JPN36	JPN	17.1674	3319339	324743
JPN37	JPN	17.1442	3289753	319513
JPN38	JPN	17.1358	3301754	321755
JPN39	JPN	17.0766	3303520	322866
JPN40	JPN	17.0728	3305005	322372
JPN41	JPN	17.0695	3312299	323004
JPN42	JPN	17.0431	3297441	322326
JPN43	JPN	17.0401	3314985	321931
JPN44	JPN	17.0256	3309445	320874
JPN45	JPN	17.0043	3333516	323390
JPN46	JPN	16.9921	3317902	323557
JPN47	JPN	16.9802	3293665	323447
JPN48	JPN	16.976	3314755	322462
JPN49	JPN	16.9681	3310289	322695
JPN50	JPN	16.9644	3322973	325607
JPN51	JPN	16.9562	3295498	321051
JPN52	JPN	16.9544	3313985	321625
JPN53	JPN	16.9414	3317638	325396
JPN54	JPN	16.9155	3311044	322212
JPN55	JPN	16.8873	3292274	321697
JPN56	JPN	16.8853	3307974	322601
JPN57	JPN	16.8529	3312944	324430
JPN58	JPN	16.8497	3310760	324631
JPN59	JPN	16.8088	3309406	324347
JPN60	JPN	16.8078	3289807	321254
JPN61	JPN	16.7904	3304051	321026
JPN62	JPN	16.7857	3317879	322932
JPN63	JPN	16.7632	3306586	323194
JPN64	JPN	16.7362	3256017	316120
JPN65	JPN	16.6921	3284138	320242
JPN66	JPN	16.6783	3309627	321448
JPN67	JPN	16.6761	3332336	326875
JPN68	JPN	16.6634	3310833	323269
JPN69	JPN	16.6545	3299332	321360
JPN70	JPN	16.6462	3303533	323622
JPN71	JPN	16.6298	3301316	321765
JPN72	JPN	16.6275	3313259	324590
JPN73	JPN	16.6227	3318268	322798
JPN74	JPN	16.6208	3304537	321196
JPN75	JPN	16.6203	3314323	322342
JPN76	JPN	16.6187	3319143	323816
JPN77	JPN	16.601	3263851	317649
JPN78	JPN	16.5963	3284729	320560
JPN79	JPN	16.5921	3319121	322263
JPN80	JPN	16.5666	3307866	320647
JPN81	JPN	16.5615	3277844	320643
JPN82	JPN	16.5569	3316524	321739
JPN83	JPN	16.5481	3304176	322810
JPN84	JPN	16.5424	3301196	322120
JPN85	JPN	16.5419	3320224	324586
JPN86	JPN	16.5407	3335102	325372
JPN87	JPN	16.5311	3292457	323019
JPN88	JPN	16.5229	3318478	326124
JPN89	JPN	16.5207	3293743	324993
JPN90	JPN	16.5163	3299876	322590
JPN91	JPN	16.5133	3313321	324701
JPN92	JPN	16.5028	3306522	320728
JPN93	JPN	16.5019	3305009	323242
JPN94	JPN	16.4996	3312734	323778
JPN95	JPN	16.4781	3303796	322288
JPN96	JPN	16.4474	3303831	323049
JPN97	JPN	16.442	3302422	321660
JPN98	JPN	16.4207	3301564	324986
JPN99	JPN	16.4053	3309228	323056
JPN100	JPN	16.4029	3315810	323513
JPN101	JPN	16.3955	3319261	325980
JPN102	JPN	16.3722	3298262	321377
JPN103	JPN	16.3664	3276726	318492
JPN104	JPN	16.3522	3294613	322181
JPN105	JPN	16.3305	3321719	325146
JPN106	JPN	16.3268	3256322	318762
JPN107	JPN	16.3212	3321920	321965
JPN108	JPN	16.3125	3299851	324042
JPN109	JPN	16.3103	3316283	322609
JPN110	JPN	16.2724	3310681	321554
JPN111	JPN	16.262	3320088	324308
JPN112	JPN	16.2548	3308847	324621
JPN113	JPN	16.2107	3312995	321716
JPN114	JPN	16.203	3308043	321408
JPN115	JPN	16.19	3310945	322256
JPN116	JPN	16.1855	3308485	323020
JPN117	JPN	16.1712	3297687	323889
JPN118	JPN	16.1711	3323185	323459
JPN119	JPN	16.1639	3316016	321831
JPN120	JPN	16.1626	3301741	322269
JPN121	JPN	16.1312	3310813	323105
JPN122	JPN	16.1198	3294654	321197
JPN123	JPN	16.1112	3291082	320387
JPN124	JPN	16.1107	3297527	322403
JPN125	JPN	16.1078	3334297	324329
JPN126	JPN	16.1077	3301462	322405
JPN127	JPN	16.0975	3297612	322686
JPN128	JPN	16.091	3303185	321763
JPN129	JPN	16.0858	3299050	321174
JPN130	JPN	16.0759	3320505	324135
JPN131	JPN	16.0642	3323233	323741
JPN132	JPN	16.0641	3280097	319899
JPN133	JPN	16.0546	3297379	323475
JPN134	JPN	16.0544	3313667	324652
JPN135	JPN	16.0454	3277724	322153
JPN136	JPN	16.0361	3315260	322124
JPN137	JPN	16.0283	3310300	322279
JPN138	JPN	16.0138	3317146	323805
JPN139	JPN	16.0111	3310716	321252
JPN140	JPN	16.0054	3313793	322368
JPN141	JPN	16	3286905	321933
JPN142	JPN	15.9977	3290829	321639
JPN143	JPN	15.981	3297292	321265
JPN144	JPN	15.9797	3285651	320948
JPN145	JPN	15.976	3306908	321962
JPN146	JPN	15.9709	3297366	321408
JPN147	JPN	15.9587	3305410	321551
JPN148	JPN	15.9562	3296599	322484
JPN149	JPN	15.9456	3333140	324945
JPN150	JPN	15.9266	3318471	324066
JPN151	JPN	15.9076	3331939	325768
JPN152	JPN	15.9039	3314422	321917
JPN153	JPN	15.8966	3297364	322381
JPN154	JPN	15.8964	3256562	317746
JPN155	JPN	15.8884	3309336	323721
JPN156	JPN	15.8751	3293990	324622
JPN157	JPN	15.872	3306329	321178
JPN158	JPN	15.8471	3285720	320864
JPN159	JPN	15.8408	3294066	321141
JPN160	JPN	15.8407	3333599	325057
JPN161	JPN	15.8385	3326960	323542
JPN162	JPN	15.8302	3294308	325138
JPN163	JPN	15.8211	3303493	322794
JPN164	JPN	15.8127	3305354	326041
JPN165	JPN	15.8126	3315693	323488
JPN166	JPN	15.8006	3319128	321391
JPN167	JPN	15.7908	3319967	322539
JPN168	JPN	15.7876	3304231	321585
JPN169	JPN	15.7836	3301712	322726
JPN170	JPN	15.778	3294708	322192
JPN171	JPN	15.7628	3310891	322940
JPN172	JPN	15.7575	3305527	324932
JPN173	JPN	15.745	3309356	320515
JPN174	JPN	15.7437	3289947	321201
JPN175	JPN	15.7402	3305214	321153
JPN176	JPN	15.7379	3298335	322464
JPN177	JPN	15.7361	3310754	321319
JPN178	JPN	15.7297	3305202	321912
JPN179	JPN	15.7173	3305526	321914
JPN180	JPN	15.7158	3207452	313363
JPN181	JPN	15.7141	3311442	324464
JPN182	JPN	15.7101	3299545	321551
JPN183	JPN	15.7059	3301677	324181
JPN184	JPN	15.6991	3239018	316248
JPN185	JPN	15.6919	3302738	322341
JPN186	JPN	15.685	3313975	323659
JPN187	JPN	15.6704	3302638	323402
JPN188	JPN	15.6665	3301667	321202
JPN189	JPN	15.66	3317516	322493
JPN190	JPN	15.6541	3289251	321433
JPN191	JPN	15.6506	3300887	324157
JPN192	JPN	15.643	3283033	320503
JPN193	JPN	15.639	3319748	323291
JPN194	JPN	15.6366	3321464	323193
JPN195	JPN	15.6308	3315392	323260
JPN196	JPN	15.628	3308202	323093
JPN197	JPN	15.6191	3301226	321918
JPN198	JPN	15.6152	3313389	322322
JPN199	JPN	15.6106	3323369	325997
JPN200	JPN	15.6089	3295511	323170
JPN201	JPN	15.6065	3303855	322471
JPN202	JPN	15.6035	3304919	322556
JPN203	JPN	15.601	3307882	322960
JPN204	JPN	15.5914	3297508	321776
JPN205	JPN	15.5895	3305660	320097
JPN206	JPN	15.5851	3298667	321718
JPN207	JPN	15.5823	3305017	325176
JPN208	JPN	15.5821	3338285	327288
JPN209	JPN	15.5707	3274977	319972
JPN210	JPN	15.5602	3304654	324740
JPN211	JPN	15.5338	3317837	321925
JPN212	JPN	15.5281	3305067	326023
JPN213	JPN	15.5242	3307621	325687
JPN214	JPN	15.5213	3317366	321490
JPN215	JPN	15.5104	3317342	321189
JPN216	JPN	15.5048	3307968	324592
JPN217	JPN	15.5031	3303424	323163
JPN218	JPN	15.4924	3307769	322606
JPN219	JPN	15.4915	3324142	323764
JPN220	JPN	15.4902	3313098	323667
JPN221	JPN	15.4814	3324750	324021
JPN222	JPN	15.4778	3305819	321923
JPN223	JPN	15.4745	3329655	323456
JPN224	JPN	15.4636	3221900	314899
JPN225	JPN	15.4522	3290842	321225
JPN226	JPN	15.4489	3313469	321369
JPN227	JPN	15.4476	3265358	319968
JPN228	JPN	15.4404	3324624	325187
JPN229	JPN	15.4315	3314776	323435
JPN230	JPN	15.4302	3306148	322776
JPN231	JPN	15.4257	3315903	322378
JPN232	JPN	15.4255	3311920	322991
JPN233	JPN	15.425	3250131	317209
JPN234	JPN	15.4188	3290960	323374
JPN235	JPN	15.4175	3293873	322561
JPN236	JPN	15.4128	3301686	323076
JPN237	JPN	15.4094	3284500	321703
JPN238	JPN	15.4029	3297635	321012
JPN239	JPN	15.3988	3292726	322870
JPN240	JPN	15.3975	3318158	326706
JPN241	JPN	15.3909	3303944	321331
JPN242	JPN	15.3764	3314272	323065
JPN243	JPN	15.3717	3328938	323359
JPN244	JPN	15.3598	3308384	322034
JPN245	JPN	15.3431	3299828	322011
JPN246	JPN	15.3324	3315506	325881
JPN247	JPN	15.332	3312964	322252
JPN248	JPN	15.3187	3300275	322104
JPN249	JPN	15.3125	3321746	323117
JPN250	JPN	15.309	3313719	323061
JPN251	JPN	15.2942	3315350	326254
JPN252	JPN	15.2914	3322190	324882
JPN253	JPN	15.2865	3309306	322874
JPN254	JPN	15.2767	3299363	320322
JPN255	JPN	15.2676	3308852	321255
JPN256	JPN	15.2664	3258212	317029
JPN257	JPN	15.2627	3295875	321105
JPN258	JPN	15.2593	3321135	322962
JPN259	JPN	15.2502	3328843	326453
JPN260	JPN	15.2501	3292061	321092
JPN261	JPN	15.2457	3303291	322463
JPN262	JPN	15.2427	3305734	322748
JPN263	JPN	15.2367	3278790	320200
JPN264	JPN	15.2328	3284487	320288
JPN265	JPN	15.2136	3289887	321453
JPN266	JPN	15.1988	3319496	321879
JPN267	JPN	15.1958	3316803	321480
JPN268	JPN	15.1747	3297724	320904
JPN269	JPN	15.1724	3242025	316874
JPN270	JPN	15.1705	3309367	324172
JPN271	JPN	15.1673	3319857	322682
JPN272	JPN	15.164	3303928	319985
JPN273	JPN	15.1525	3325943	323030
JPN274	JPN	15.1266	3301789	321620
JPN275	JPN	15.0975	3310654	321974
JPN276	JPN	15.0946	3308604	323607
JPN277	JPN	15.0716	3317490	323557
JPN278	JPN	15.0675	3280218	318948
JPN279	JPN	15.0407	3305778	321304
JPN280	JPN	15.0253	3198495	313990
JPN281	JPN	15.0212	3305614	322357
JPN282	JPN	15.0129	3293737	320509
JPN283	JPN	15.0051	3276791	319344
JPN284	JPN	14.9936	3293607	321849
JPN285	JPN	14.9887	3300152	321877
JPN286	JPN	14.9782	3325133	322844
JPN287	JPN	14.9559	3319204	323504
JPN288	JPN	14.9389	3292267	321727
JPN289	JPN	14.9222	3288639	320416
JPN290	JPN	14.9185	3305503	323505
JPN291	JPN	14.9113	3324069	323429
JPN292	JPN	14.9063	3236353	317159
JPN293	JPN	14.9057	3291900	321495
JPN294	JPN	14.8837	3290422	324988
JPN295	JPN	14.8738	3286441	318493
JPN296	JPN	14.8665	3309095	321974
JPN297	JPN	14.8638	3320787	323545
JPN298	JPN	14.8587	3318481	324094
JPN299	JPN	14.8502	3313258	324146
JPN300	JPN	14.8476	3314586	323532
JPN301	JPN	14.8448	3319492	323797
JPN302	JPN	14.8437	3304182	322237
JPN303	JPN	14.8393	3310005	323190
JPN304	JPN	14.8366	3293626	322910
JPN305	JPN	14.8305	3294855	320432
JPN306	JPN	14.8299	3326713	322195
JPN307	JPN	14.8263	3287626	321153
JPN308	JPN	14.8172	3319453	321550
JPN309	JPN	14.8158	3319650	322767
JPN310	JPN	14.8155	3305872	320902
JPN311	JPN	14.8108	3306287	324330
JPN312	JPN	14.8101	3312031	323324
JPN313	JPN	14.7935	3308939	323892
JPN314	JPN	14.7918	3306796	322092
JPN315	JPN	14.7873	3313600	321623
JPN316	JPN	14.7809	3186552	310480
JPN317	JPN	14.7798	3319123	322749
JPN318	JPN	14.7792	3311306	323819
JPN319	JPN	14.7791	3313445	323506
JPN320	JPN	14.777	3285013	322769
JPN321	JPN	14.7721	3295937	319235
JPN322	JPN	14.7693	3314775	323314
JPN323	JPN	14.7648	3310146	321812
JPN324	JPN	14.7639	3311205	322332
JPN325	JPN	14.7547	3334679	325633
JPN326	JPN	14.7475	3288399	321105
JPN327	JPN	14.7311	3298084	322716
JPN328	JPN	14.7042	3245881	315380
JPN329	JPN	14.6989	3301604	322027
JPN330	JPN	14.6915	3305358	320009
JPN331	JPN	14.6826	3317445	321659
JPN332	JPN	14.6785	3295202	322189
JPN333	JPN	14.6689	3303620	321993
JPN334	JPN	14.6563	3295218	323456
JPN335	JPN	14.6421	3295053	319799
JPN336	JPN	14.6177	3305816	320725
JPN337	JPN	14.5694	3283121	320708
JPN338	JPN	14.5688	3309717	322770
JPN339	JPN	14.5562	3306960	321705
JPN340	JPN	14.5535	3295081	320762
JPN341	JPN	14.5276	3331055	324519
JPN342	JPN	14.4916	3307385	320763
JPN343	JPN	14.463	3270655	317811
JPN344	JPN	14.4614	3312841	324063
JPN345	JPN	14.4489	3239838	315795
JPN346	JPN	14.4486	3325315	324356
JPN347	JPN	14.4257	3286925	320968
JPN348	JPN	14.4243	3322909	324483
JPN349	JPN	14.3896	3309670	324689
JPN350	JPN	14.3871	3312163	320948
JPN351	JPN	14.3714	3298632	322877
JPN352	JPN	14.3599	3321571	322836
JPN353	JPN	14.3536	3306778	324623
JPN354	JPN	14.35	3300955	321949
JPN355	JPN	14.3438	3304006	322066
JPN356	JPN	14.3177	3318667	322348
JPN357	JPN	14.3044	3309095	321531
JPN358	JPN	14.2923	3288198	319320
JPN359	JPN	14.2644	3304262	322416
JPN360	JPN	14.2568	3311070	321424
JPN361	JPN	14.2528	3320595	323618
JPN362	JPN	14.2522	3286278	319378
JPN363	JPN	14.2472	3309088	320994
JPN364	JPN	14.2453	3289088	321719
JPN365	JPN	14.2303	3316039	322790
JPN366	JPN	14.2266	3315734	323163
JPN367	JPN	14.2022	3302624	320643
JPN368	JPN	14.1506	3325564	325200
JPN369	JPN	14.1336	3305195	321853
JPN370	JPN	14.1319	3251951	317289
JPN371	JPN	14.0801	3300586	319671
JPN372	JPN	14.0728	3305253	323110
JPN373	JPN	14.0399	3313293	321725
JPN374	JPN	14.0176	3307842	320661
JPN375	JPN	14	3273626	317566
JPN376	JPN	13.9818	3302652	320921
JPN377	JPN	13.9791	3306595	321294
JPN378	JPN	13.9444	3293403	320611
JPN379	JPN	13.9227	3311189	320513
JPN380	JPN	13.9134	3283153	319698
JPN381	JPN	13.9122	3303612	322438
JPN382	JPN	13.9035	3309480	321568
JPN383	JPN	13.8705	3298964	320954
JPN384	JPN	13.8262	3291212	324085
JPN385	JPN	13.7577	3293418	320757
JPN386	JPN	13.6974	3272227	318459
JPN387	JPN	13.6931	3308754	320772
JPN388	JPN	13.5762	3299996	321313
JPN389	JPN	13.5738	3321176	321065
JPN390	JPN	13.5632	3297605	319897
JPN391	JPN	13.5369	3318968	320969
JPN392	JPN	13.4346	3302051	324653
JPN393	JPN	13.4126	3311230	322823
JPN394	JPN	13.3358	3296620	319371
JPN395	JPN	13.2496	3307852	323182
JPN396	JPN	12.8158	3308476	319230
KOR01	KOR	35.8099	3305332	323069
KOR02	KOR	35.0982	3311950	322154
KOR03	KOR	34.6705	3312731	321742
KOR04	KOR	34.4933	3309883	324114
KOR05	KOR	34.4191	3316262	322554
KOR06	KOR	34.3184	3323858	323959
KOR07	KOR	34.1565	3308953	322096
KOR08	KOR	34.1007	3299944	323720
KOR09	KOR	34.0107	3294596	319678
KOR10	KOR	34.0006	3291639	323074
KOR11	KOR	33.8375	3330806	324614
KOR12	KOR	33.774	3298451	322312
KOR13	KOR	33.7666	3316203	322482
KOR14	KOR	33.7227	3307684	324470
KOR15	KOR	33.7108	3312762	322109
KOR16	KOR	33.7014	3332973	322963
KOR17	KOR	33.6978	3310211	322811
KOR18	KOR	33.6691	3290246	320157
KOR19	KOR	33.6401	3294088	320547
KOR20	KOR	33.6154	3333384	324105
KOR21	KOR	33.5091	3315655	325394
KOR22	KOR	33.4836	3331164	323164
KOR23	KOR	33.4594	3328577	326891
KOR24	KOR	33.3787	3314581	322268
KOR25	KOR	33.3555	3291994	321516
KOR26	KOR	33.2556	3302761	323180
KOR27	KOR	33.2278	3300543	323577
KOR28	KOR	33.1882	3330184	323410
KOR29	KOR	33.1452	3294800	322734
KOR30	KOR	33.1151	3327767	323723
KOR31	KOR	33.0567	3297988	321423
KOR32	KOR	33.0441	3291728	323205
KOR33	KOR	32.9868	3302522	324138
KOR34	KOR	32.9574	3323114	324820
KOR35	KOR	32.9518	3318455	324617
KOR36	KOR	32.9439	3298614	321945
KOR37	KOR	32.9421	3330410	324100
KOR38	KOR	32.9029	3303277	323251
KOR39	KOR	32.8834	3295591	322711
KOR40	KOR	32.8696	3320044	325640
KOR41	KOR	32.7913	3323078	326560
KOR42	KOR	32.7803	3308580	323559
KOR43	KOR	32.7743	3306067	321919
KOR44	KOR	32.767	3326356	324300
KOR45	KOR	32.7377	3316252	321462
KOR46	KOR	32.6627	3328145	326068
KOR47	KOR	32.6271	3333109	322966
KOR48	KOR	32.6077	3327363	326055
KOR49	KOR	32.5954	3320488	323225
KOR50	KOR	32.5919	3313561	323553
KOR51	KOR	32.5859	3309214	322546
KOR52	KOR	32.575	3315002	325667
KOR53	KOR	32.5633	3324177	324708
KOR54	KOR	32.5317	3323074	323949
KOR55	KOR	32.4928	3302925	324530
KOR56	KOR	32.4763	3326495	324619
KOR57	KOR	32.4663	3306053	324585
KOR58	KOR	32.4172	3316309	324815
KOR59	KOR	32.4002	3324948	322977
KOR60	KOR	32.3932	3321579	322972
KOR61	KOR	32.3611	3334357	324260
KOR62	KOR	32.2599	3325889	324774
KOR63	KOR	32.2539	3294991	322149
KOR64	KOR	32.2298	3315203	325066
KOR65	KOR	32.1874	3331074	324152
KOR66	KOR	32.1867	3317969	321732
KOR67	KOR	32.1803	3309744	323656
KOR68	KOR	32.1748	3321022	324088
KOR69	KOR	32.1584	3318867	323118
KOR70	KOR	32.1313	3302651	322295
KOR71	KOR	32.1149	3317690	323489
KOR72	KOR	32.0779	3293052	323818
KOR73	KOR	32.0063	3313131	321869
KOR74	KOR	31.9904	3311004	323060
KOR75	KOR	31.99	3327413	324509
KOR76	KOR	31.9733	3319022	323567
KOR77	KOR	31.9677	3321482	324081
KOR78	KOR	31.9597	3308977	323557
KOR79	KOR	31.929	3309328	321116
KOR80	KOR	31.9116	3300046	321607
KOR81	KOR	31.9094	3311267	324014
KOR82	KOR	31.8849	3322036	322661
KOR83	KOR	31.7909	3310711	322609
KOR84	KOR	31.7519	3312273	320820
KOR85	KOR	31.737	3292965	322812
KOR86	KOR	31.7058	3345031	323976
KOR87	KOR	31.6879	3305066	323130
KOR88	KOR	31.6856	3292896	320982
KOR89	KOR	31.6815	3318125	323294
KOR90	KOR	31.6546	3331347	323497
KOR91	KOR	31.6492	3319215	324724
KOR92	KOR	31.6396	3295093	322869
KOR93	KOR	31.6317	3305347	324175
KOR94	KOR	31.5983	3329701	323278
KOR95	KOR	31.5936	3301563	321610
KOR96	KOR	31.5749	3311865	322541
KOR97	KOR	31.5271	3311044	322351
KOR98	KOR	31.5051	3314958	324469
KOR99	KOR	31.4939	3304068	323164
KOR100	KOR	31.489	3311471	321754
KOR101	KOR	31.4742	3297216	323246
KOR102	KOR	31.4421	3320903	324133
KOR103	KOR	31.3814	3310086	323337
KOR104	KOR	31.362	3313097	324835
KOR105	KOR	31.3539	3308936	321613
KOR106	KOR	31.3511	3327123	326467
KOR107	KOR	31.3281	3313674	323280
KOR108	KOR	31.3262	3313827	321686
KOR109	KOR	31.3185	3334759	325912
KOR110	KOR	31.3159	3301807	322564
KOR111	KOR	31.3082	3315133	321116
KOR112	KOR	31.2638	3319225	322330
KOR113	KOR	31.2244	3319520	322719
KOR114	KOR	31.1833	3306335	324493
KOR115	KOR	31.1797	3303961	324878
KOR116	KOR	31.1748	3290793	321841
KOR117	KOR	31.1579	3308263	323730
KOR118	KOR	31.1262	3319038	326168
KOR119	KOR	31.0777	3291421	323088
KOR120	KOR	31.0509	3303538	323692
KOR121	KOR	31.0121	3310021	323710
KOR122	KOR	31.0108	3319527	322931
KOR123	KOR	30.9676	3318496	322986
KOR124	KOR	30.9624	3322847	322957
KOR125	KOR	30.9487	3325180	324338
KOR126	KOR	30.944	3328763	324735
KOR127	KOR	30.9366	3323273	323497
KOR128	KOR	30.9304	3323725	325740
KOR129	KOR	30.9267	3317570	323006
KOR130	KOR	30.9017	3308594	322378
KOR131	KOR	30.8919	3326425	323946
KOR132	KOR	30.8747	3318315	321144
KOR133	KOR	30.8332	3322989	324553
KOR134	KOR	30.8326	3325143	323357
KOR135	KOR	30.8293	3299462	321842
KOR136	KOR	30.8169	3337509	323649
KOR137	KOR	30.8134	3300291	325181
KOR138	KOR	30.8076	3327455	322703
KOR139	KOR	30.7922	3305620	322494
KOR140	KOR	30.7764	3311609	320367
KOR141	KOR	30.7762	3299365	323411
KOR142	KOR	30.7695	3307608	321119
KOR143	KOR	30.7569	3317606	322792
KOR144	KOR	30.7531	3330192	323743
KOR145	KOR	30.7492	3313072	324537
KOR146	KOR	30.744	3314189	322150
KOR147	KOR	30.7438	3310112	324204
KOR148	KOR	30.7435	3312515	323236
KOR149	KOR	30.7331	3308532	322246
KOR150	KOR	30.7229	3308666	321973
KOR151	KOR	30.6052	3322492	323401
KOR152	KOR	30.5519	3303477	323674
KOR153	KOR	30.5372	3316696	323563
KOR154	KOR	30.4986	3336240	325390
KOR155	KOR	30.4803	3320461	323194
KOR156	KOR	30.472	3330602	324952
KOR157	KOR	30.4461	3310496	323980
KOR158	KOR	30.4453	3325223	326951
KOR159	KOR	30.425	3310747	322688
KOR160	KOR	30.3498	3306025	324939
KOR161	KOR	30.3395	3335726	323871
KOR162	KOR	30.3365	3328341	322914
KOR163	KOR	30.3312	3328923	322938
KOR164	KOR	30.3102	3322498	322294
KOR165	KOR	30.3084	3317146	324016
KOR166	KOR	30.3054	3310403	322865
KOR167	KOR	30.256	3310822	325620
KOR168	KOR	30.2438	3320472	324443
KOR169	KOR	30.2313	3306632	323733
KOR170	KOR	30.2186	3335688	325813
KOR171	KOR	30.2117	3333748	323558
KOR172	KOR	30.2056	3292738	322031
KOR173	KOR	30.1923	3311707	324623
KOR174	KOR	30.1716	3290701	321369
KOR175	KOR	30.1542	3310394	322025
KOR176	KOR	30.1203	3323156	323341
KOR177	KOR	30.1029	3329221	323730
KOR178	KOR	30.0894	3315330	323260
KOR179	KOR	30.0777	3301136	319766
KOR180	KOR	30.0631	3301528	322705
KOR181	KOR	30.061	3308038	322620
KOR182	KOR	30.0488	3297587	322643
KOR183	KOR	30.0453	3318469	324882
KOR184	KOR	30.0276	3307920	324485
KOR185	KOR	30.0231	3295015	322563
KOR186	KOR	30.0182	3317524	324344
KOR187	KOR	30.0096	3302509	324050
KOR188	KOR	30.0085	3317801	324444
KOR189	KOR	29.9806	3378972	328157
KOR190	KOR	29.968	3306667	323331
KOR191	KOR	29.9627	3306819	321609
KOR192	KOR	29.8963	3331038	324184
KOR193	KOR	29.8845	3322390	322496
KOR194	KOR	29.879	3305244	322179
KOR195	KOR	29.8601	3313240	322482
KOR196	KOR	29.8072	3325716	322764
KOR197	KOR	29.7986	3314479	325269
KOR198	KOR	29.7968	3323531	323890
KOR199	KOR	29.7797	3321977	321839
KOR200	KOR	29.7729	3320890	323191
KOR201	KOR	29.7399	3311050	323233
KOR202	KOR	29.7306	3316321	322257
KOR203	KOR	29.6926	3327660	324074
KOR204	KOR	29.6811	3320748	321955
KOR205	KOR	29.6796	3293924	323051
KOR206	KOR	29.6632	3306573	321544
KOR207	KOR	29.6625	3304880	324114
KOR208	KOR	29.6468	3325367	323753
KOR209	KOR	29.6355	3303826	322443
KOR210	KOR	29.584	3335860	326552
KOR211	KOR	29.581	3319193	323615
KOR212	KOR	29.5657	3287850	322841
KOR213	KOR	29.5047	3314777	324847
KOR214	KOR	29.4975	3320068	323167
KOR215	KOR	29.4511	3314465	324266
KOR216	KOR	29.4483	3309467	323342
KOR217	KOR	29.4288	3310708	323351
KOR218	KOR	29.3829	3321415	322312
KOR219	KOR	29.3011	3323625	323769
KOR220	KOR	29.2659	3301353	323577
KOR221	KOR	29.2525	3295760	323015
KOR222	KOR	29.2455	3322397	323811
KOR223	KOR	29.1915	3281394	321339
KOR224	KOR	29.1622	3308882	323206
KOR225	KOR	29.1497	3320535	323217
KOR226	KOR	29.0511	3289233	321593
KOR227	KOR	28.9851	3318771	322605
KOR228	KOR	28.985	3308544	323405
KOR229	KOR	28.9776	3327609	323376
KOR230	KOR	28.9322	3322645	325945
KOR231	KOR	28.8959	3314064	323282
KOR232	KOR	28.877	3330011	325533
KOR233	KOR	28.7782	3316512	324352
KOR234	KOR	28.7702	3305940	321250
KOR235	KOR	28.7509	3303177	324468
KOR236	KOR	28.7279	3322590	323966
KOR237	KOR	28.6089	3322792	321573
KOR238	KOR	28.5742	3327744	325753
KOR239	KOR	28.4803	3319151	322390
KOR240	KOR	28.3975	3317264	322193
KOR241	KOR	28.352	3326407	325959
KOR242	KOR	28.1959	3304791	323931
KOR243	KOR	28.0773	3312460	322879
KOR244	KOR	28.0752	3299104	321277
KOR245	KOR	27.962	3318825	322370
KOR246	KOR	27.2795	3295828	321789
KOR247	KOR	26.6552	3318632	324727
KOR248	KOR	25.5565	3306691	325045
KOR249	KOR	25.0017	3319843	324790
KOR250	KOR	24.9361	3286625	318847
KOR251	KOR	23.9477	3316054	325450
KOR252	KOR	23.9094	3321224	326041
KOR253	KOR	23.7303	3301936	323625
KOR254	KOR	23.7144	3319500	327470
KOR255	KOR	23.4698	3312251	326057
KOR256	KOR	23.4467	3295259	324096
KOR257	KOR	23.4183	3313948	327191
KOR258	KOR	23.4065	3321839	327274
KOR259	KOR	22.7594	3332830	325422
KOR260	KOR	22.759	3291666	326627
KOR261	KOR	22.6815	3333278	329286
KOR262	KOR	22.6563	3313852	325457
KOR263	KOR	22.6152	3311179	326586
KOR264	KOR	22.48	3303676	323410
KOR265	KOR	22.4754	3309208	326499
KOR266	KOR	22.4052	3327043	324726
KOR267	KOR	22.3701	3319569	328402
KOR268	KOR	22.3201	3317295	327107
KOR269	KOR	22.2891	3304846	326687
KOR270	KOR	22.2709	3336829	329908
KOR271	KOR	22.2587	3318910	327487
KOR272	KOR	22.1828	3340616	328894
KOR273	KOR	22.1772	3298826	325469
KOR274	KOR	22.1501	3317367	326369
KOR275	KOR	22.119	3293507	321760
KOR276	KOR	22.1141	3331362	327522
KOR277	KOR	22.1124	3305706	323417
KOR278	KOR	22.0415	3334877	328674
KOR279	KOR	22.0278	3303105	326532
KOR280	KOR	21.996	3302810	325124
KOR281	KOR	21.9893	3308162	328328
KOR282	KOR	21.8775	3310430	323161
KOR283	KOR	21.8687	3332154	327420
KOR284	KOR	21.8601	3323413	327919
KOR285	KOR	21.8435	3320750	323267
KOR286	KOR	21.8214	3313645	325351
KOR287	KOR	21.8092	3294777	325747
KOR288	KOR	21.7912	3319772	325085
KOR289	KOR	21.7884	3295103	325657
KOR290	KOR	21.7863	3316692	325155
KOR291	KOR	21.7002	3325204	327232
KOR292	KOR	21.6937	3308454	325209
KOR293	KOR	21.6908	3328149	328619
KOR294	KOR	21.6897	3298464	323722
KOR295	KOR	21.6351	3304112	322534
KOR296	KOR	21.6253	3318946	325527
KOR297	KOR	21.6217	3330774	329012
KOR298	KOR	21.6118	3320914	327498
KOR299	KOR	21.6022	3311744	327386
KOR300	KOR	21.5989	3314904	323193
KOR301	KOR	21.5957	3318139	323075
KOR302	KOR	21.5946	3315375	324941
KOR303	KOR	21.5752	3310633	322904
KOR304	KOR	21.562	3329460	326093
KOR305	KOR	21.5452	3301573	324071
KOR306	KOR	21.5142	3307211	323330
KOR307	KOR	21.5141	3323710	327113
KOR308	KOR	21.4799	3291355	324169
KOR309	KOR	21.4786	3293434	325253
KOR310	KOR	21.4763	3312079	325565
KOR311	KOR	21.4619	3317183	327147
KOR312	KOR	21.4527	3311192	323391
KOR313	KOR	21.439	3303514	326799
KOR314	KOR	21.4228	3300530	326297
KOR315	KOR	21.4182	3324140	327259
KOR316	KOR	21.4035	3303927	326440
KOR317	KOR	21.3948	3315016	324416
KOR318	KOR	21.3809	3291696	325175
KOR319	KOR	21.3776	3314718	328703
KOR320	KOR	21.3703	3314133	321172
KOR321	KOR	21.3634	3324407	325116
KOR322	KOR	21.3513	3300990	325210
KOR323	KOR	21.3458	3326462	328581
KOR324	KOR	21.3418	3307097	323772
KOR325	KOR	21.3288	3322969	324230
KOR326	KOR	21.3252	3314088	325677
KOR327	KOR	21.3169	3308760	326505
KOR328	KOR	21.3168	3307741	325181
KOR329	KOR	21.3021	3335443	328705
KOR330	KOR	21.297	3291794	324125
KOR331	KOR	21.2864	3329702	324405
KOR332	KOR	21.2797	3315324	325626
KOR333	KOR	21.2722	3330403	327108
KOR334	KOR	21.2621	3332375	325389
KOR335	KOR	21.256	3319083	328168
KOR336	KOR	21.2447	3305907	326969
KOR337	KOR	21.2377	3314183	322868
KOR338	KOR	21.2271	3302885	327632
KOR339	KOR	21.2236	3326735	326549
KOR340	KOR	21.2228	3312181	325665
KOR341	KOR	21.2212	3301110	324559
KOR342	KOR	21.2146	3308494	326801
KOR343	KOR	21.2126	3317228	326098
KOR344	KOR	21.2098	3285785	322396
KOR345	KOR	21.1998	3295743	326243
KOR346	KOR	21.1993	3300934	327224
KOR347	KOR	21.1782	3323451	323303
KOR348	KOR	21.1782	3300549	327637
KOR349	KOR	21.1748	3324875	325713
KOR350	KOR	21.1698	3298192	325228
KOR351	KOR	21.1627	3318303	323699
KOR352	KOR	21.1549	3317423	325989
KOR353	KOR	21.1485	3305671	326629
KOR354	KOR	21.138	3331639	326618
KOR355	KOR	21.1277	3313335	327035
KOR356	KOR	21.1269	3320031	323653
KOR357	KOR	21.1255	3326469	328778
KOR358	KOR	21.12	3317374	324465
KOR359	KOR	21.1166	3312587	323472
KOR360	KOR	21.0929	3313194	327046
KOR361	KOR	21.0835	3306591	323585
KOR362	KOR	21.0726	3313196	324301
KOR363	KOR	21.0718	3324294	326607
KOR364	KOR	21.0698	3293316	323020
KOR365	KOR	21.0682	3308765	323504
KOR366	KOR	21.0656	3308035	324910
KOR367	KOR	21.0652	3305551	323749
KOR368	KOR	21.0527	3325090	324850
KOR369	KOR	21.0314	3309018	323151
KOR370	KOR	21.0224	3306954	325531
KOR371	KOR	21.0026	3289133	325017
KOR372	KOR	20.981	3309495	326573
KOR373	KOR	20.9684	3296821	322732
KOR374	KOR	20.9629	3322731	324228
KOR375	KOR	20.9379	3308010	327910
KOR376	KOR	20.9302	3329550	325648
KOR377	KOR	20.9255	3306242	324124
KOR378	KOR	20.9238	3305609	325586
KOR379	KOR	20.9185	3319327	325404
KOR380	KOR	20.9142	3304548	324741
KOR381	KOR	20.9071	3302993	326244
KOR382	KOR	20.8991	3307378	324527
KOR383	KOR	20.8958	3320044	327237
KOR384	KOR	20.8917	3299939	321950
KOR385	KOR	20.8838	3296734	324693
KOR386	KOR	20.876	3312096	325050
KOR387	KOR	20.8757	3295222	322535
KOR388	KOR	20.8746	3304547	325023
KOR389	KOR	20.8668	3314224	326130
KOR390	KOR	20.8654	3309441	326465
KOR391	KOR	20.8545	3316458	328877
KOR392	KOR	20.8538	3306768	326941
KOR393	KOR	20.8457	3291510	323949
KOR394	KOR	20.8455	3306177	322895
KOR395	KOR	20.8426	3340429	327662
KOR396	KOR	20.8285	3305564	326842
KOR397	KOR	20.828	3326906	326429
KOR398	KOR	20.8226	3299298	324958
KOR399	KOR	20.7979	3323175	325760
KOR400	KOR	20.7978	3293853	324332
KOR401	KOR	20.7972	3310656	326376
KOR402	KOR	20.7953	3321633	326151
KOR403	KOR	20.7883	3300029	321344
KOR404	KOR	20.7841	3303552	327361
KOR405	KOR	20.7821	3326374	324745
KOR406	KOR	20.7811	3325171	325293
KOR407	KOR	20.7732	3294401	323894
KOR408	KOR	20.7648	3318260	324044
KOR409	KOR	20.7625	3314932	322594
KOR410	KOR	20.7624	3305393	325413
KOR411	KOR	20.7608	3315252	327413
KOR412	KOR	20.7549	3309302	324537
KOR413	KOR	20.7539	3309730	326120
KOR414	KOR	20.7497	3311899	325148
KOR415	KOR	20.738	3324044	329150
KOR416	KOR	20.7273	3313130	325958
KOR417	KOR	20.7015	3329363	326299
KOR418	KOR	20.696	3315689	325810
KOR419	KOR	20.6897	3328940	327166
KOR420	KOR	20.6872	3315211	323557
KOR421	KOR	20.6768	3312680	324528
KOR422	KOR	20.6745	3289426	325418
KOR423	KOR	20.6707	3309165	322733
KOR424	KOR	20.6632	3316709	323580
KOR425	KOR	20.6378	3324399	326086
KOR426	KOR	20.6334	3415968	334391
KOR427	KOR	20.6299	3314861	326286
KOR428	KOR	20.625	3291475	321762
KOR429	KOR	20.6244	3315771	323024
KOR430	KOR	20.623	3309610	327782
KOR431	KOR	20.6181	3323242	324844
KOR432	KOR	20.6144	3312634	326896
KOR433	KOR	20.6066	3318025	324674
KOR434	KOR	20.598	3319109	327471
KOR435	KOR	20.5876	3324042	326261
KOR436	KOR	20.5861	3310477	324010
KOR437	KOR	20.5845	3317402	324547
KOR438	KOR	20.579	3290746	325355
KOR439	KOR	20.5623	3317976	324746
KOR440	KOR	20.5619	3327793	325907
KOR441	KOR	20.5547	3295917	321100
KOR442	KOR	20.5514	3329847	329022
KOR443	KOR	20.5352	3320373	328232
KOR444	KOR	20.5295	3306218	327130
KOR445	KOR	20.5208	3306271	322640
KOR446	KOR	20.51	3316343	325413
KOR447	KOR	20.5071	3311758	322909
KOR448	KOR	20.5067	3314469	324025
KOR449	KOR	20.5051	3312773	322788
KOR450	KOR	20.4996	3299711	324905
KOR451	KOR	20.4899	3333513	324395
KOR452	KOR	20.4853	3312767	322809
KOR453	KOR	20.4672	3318213	324821
KOR454	KOR	20.4615	3318376	327301
KOR455	KOR	20.4585	3307090	324592
KOR456	KOR	20.4446	3311185	327725
KOR457	KOR	20.4265	3320700	322285
KOR458	KOR	20.4249	3300704	324054
KOR459	KOR	20.4139	3312451	326999
KOR460	KOR	20.4055	3323555	327196
KOR461	KOR	20.4017	3313327	327915
KOR462	KOR	20.3917	3325702	326926
KOR463	KOR	20.3894	3323892	324337
KOR464	KOR	20.3843	3315244	324392
KOR465	KOR	20.3708	3293182	320558
KOR466	KOR	20.3668	3340361	329997
KOR467	KOR	20.3493	3317840	321802
KOR468	KOR	20.3385	3329249	329245
KOR469	KOR	20.3302	3304790	325664
KOR470	KOR	20.3141	3301497	323431
KOR471	KOR	20.3098	3313173	325179
KOR472	KOR	20.3074	3325976	327584
KOR473	KOR	20.2932	3297233	324058
KOR474	KOR	20.2924	3321175	323257
KOR475	KOR	20.289	3298580	324462
KOR476	KOR	20.2799	3322763	325910
KOR477	KOR	20.2673	3316516	323339
KOR478	KOR	20.2543	3301206	324992
KOR479	KOR	20.2506	3314245	326254
KOR480	KOR	20.2492	3310100	323557
KOR481	KOR	20.2481	3282545	324121
KOR482	KOR	20.2479	3309245	325601
KOR483	KOR	20.2419	3306251	325995
KOR484	KOR	20.2321	3328223	324621
KOR485	KOR	20.2274	3331420	324387
KOR486	KOR	20.2232	3326321	324690
KOR487	KOR	20.208	3298803	322740
KOR488	KOR	20.2021	3319014	326586
KOR489	KOR	20.1953	3307420	325669
KOR490	KOR	20.1934	3314190	324052
KOR491	KOR	20.1904	3295938	322716
KOR492	KOR	20.1856	3322816	323892
KOR493	KOR	20.183	3319627	323087
KOR494	KOR	20.1658	3317830	324565
KOR495	KOR	20.1574	3306600	325144
KOR496	KOR	20.1497	3299196	324686
KOR497	KOR	20.1461	3293474	321984
KOR498	KOR	20.139	3305178	328136
KOR499	KOR	20.1224	3326020	322869
KOR500	KOR	20.1205	3300596	323889
KOR501	KOR	20.1157	3316185	326985
KOR502	KOR	20.1056	3308091	325561
KOR503	KOR	20.0929	3314202	323314
KOR504	KOR	20.0897	3333128	329233
KOR505	KOR	20.0835	3310911	324424
KOR506	KOR	20.0774	3307661	326068
KOR507	KOR	20.0768	3315247	324416
KOR508	KOR	20.0738	3314491	325856
KOR509	KOR	20.0703	3317688	326163
KOR510	KOR	20.0646	3298708	325285
KOR511	KOR	20.062	3314886	327256
KOR512	KOR	20.047	3293958	322962
KOR513	KOR	20.0439	3333427	328284
KOR514	KOR	20.0427	3329930	327925
KOR515	KOR	20.0344	3309257	324145
KOR516	KOR	20.0325	3311426	325011
KOR517	KOR	20.0293	3299034	323037
KOR518	KOR	20.0284	3310137	326469
KOR519	KOR	20.0191	3302513	326508
KOR520	KOR	20.0169	3320469	325781
KOR521	KOR	19.9952	3318584	328235
KOR522	KOR	19.9729	3301536	325436
KOR523	KOR	19.9678	3317766	323253
KOR524	KOR	19.9673	3304225	320635
KOR525	KOR	19.9604	3317033	326195
KOR526	KOR	19.9599	3300718	322434
KOR527	KOR	19.9586	3320668	325707
KOR528	KOR	19.9553	3303976	326827
KOR529	KOR	19.9336	3306820	323571
KOR530	KOR	19.9333	3310115	325573
KOR531	KOR	19.9148	3334760	326390
KOR532	KOR	19.9127	3315196	323486
KOR533	KOR	19.9106	3320170	322198
KOR534	KOR	19.9019	3321925	325705
KOR535	KOR	19.8767	3315635	324342
KOR536	KOR	19.8731	3320301	323250
KOR537	KOR	19.8694	3302774	324429
KOR538	KOR	19.8688	3310828	326446
KOR539	KOR	19.8597	3314620	326656
KOR540	KOR	19.8578	3295112	324394
KOR541	KOR	19.8557	3312785	325336
KOR542	KOR	19.8356	3306390	323351
KOR543	KOR	19.8341	3316518	324292
KOR544	KOR	19.8172	3312757	323882
KOR545	KOR	19.7914	3326881	326204
KOR546	KOR	19.7733	3297690	325289
KOR547	KOR	19.7668	3293091	323873
KOR548	KOR	19.7661	3316311	322936
KOR549	KOR	19.7591	3296559	325412
KOR550	KOR	19.7551	3301754	326057
KOR551	KOR	19.7523	3295887	324449
KOR552	KOR	19.738	3305868	322662
KOR553	KOR	19.7332	3324240	326832
KOR554	KOR	19.7278	3305728	323948
KOR555	KOR	19.7137	3339112	327183
KOR556	KOR	19.7039	3325916	323838
KOR557	KOR	19.7014	3322690	327160
KOR558	KOR	19.6968	3299066	326826
KOR559	KOR	19.6927	3308684	323042
KOR560	KOR	19.6872	3323600	325094
KOR561	KOR	19.6854	3330470	325992
KOR562	KOR	19.6826	3309759	322801
KOR563	KOR	19.6789	3304170	325057
KOR564	KOR	19.6685	3304091	321873
KOR565	KOR	19.6671	3289317	324354
KOR566	KOR	19.6667	3305130	325055
KOR567	KOR	19.6652	3326971	323876
KOR568	KOR	19.6484	3302744	322677
KOR569	KOR	19.6482	3305529	323986
KOR570	KOR	19.6444	3300550	321731
KOR571	KOR	19.6345	3306690	326748
KOR572	KOR	19.6297	3326086	325787
KOR573	KOR	19.6235	3314660	325050
KOR574	KOR	19.6163	3293886	325318
KOR575	KOR	19.6149	3301852	326043
KOR576	KOR	19.6134	3331036	327860
KOR577	KOR	19.5915	3303690	322864
KOR578	KOR	19.5915	3310776	324210
KOR579	KOR	19.5896	3293411	323590
KOR580	KOR	19.5569	3324037	324660
KOR581	KOR	19.518	3297783	322322
KOR582	KOR	19.5169	3318371	325534
KOR583	KOR	19.5141	3306734	326437
KOR584	KOR	19.4995	3316766	325032
KOR585	KOR	19.4971	3295069	325820
KOR586	KOR	19.4859	3311337	323586
KOR587	KOR	19.4769	3310747	323230
KOR588	KOR	19.4696	3313046	323778
KOR589	KOR	19.4675	3303508	323473
KOR590	KOR	19.4667	3321657	324097
KOR591	KOR	19.4616	3319955	323717
KOR592	KOR	19.4587	3304496	323014
KOR593	KOR	19.4563	3312707	323635
KOR594	KOR	19.4524	3321335	324862
KOR595	KOR	19.444	3307760	328565
KOR596	KOR	19.4437	3320208	323033
KOR597	KOR	19.4417	3328797	328600
KOR598	KOR	19.402	3321953	323929
KOR599	KOR	19.3817	3319275	324745
KOR600	KOR	19.3809	3311639	327477
KOR601	KOR	19.3688	3297839	324937
KOR602	KOR	19.3511	3318948	327814
KOR603	KOR	19.3484	3329586	326745
KOR604	KOR	19.3298	3305405	327582
KOR605	KOR	19.3281	3298970	323296
KOR606	KOR	19.3239	3313046	322950
KOR607	KOR	19.315	3310318	324944
KOR608	KOR	19.3066	3323705	325427
KOR609	KOR	19.2944	3334558	325159
KOR610	KOR	19.2818	3304513	326369
KOR611	KOR	19.2673	3299501	324341
KOR612	KOR	19.2651	3330555	326955
KOR613	KOR	19.252	3300345	323186
KOR614	KOR	19.251	3318488	322956
KOR615	KOR	19.2504	3313200	324350
KOR616	KOR	19.235	3310805	325401
KOR617	KOR	19.2289	3313711	324163
KOR618	KOR	19.2274	3312271	323402
KOR619	KOR	19.2176	3315091	325244
KOR620	KOR	19.2069	3324487	324209
KOR621	KOR	19.2052	3295740	323799
KOR622	KOR	19.1909	3313848	323549
KOR623	KOR	19.1888	3318422	325806
KOR624	KOR	19.1871	3280871	323061
KOR625	KOR	19.1865	3302481	323736
KOR626	KOR	19.1832	3325350	325613
KOR627	KOR	19.1675	3334514	324820
KOR628	KOR	19.1669	3320234	323583
KOR629	KOR	19.1651	3317524	327411
KOR630	KOR	19.1627	3323178	326352
KOR631	KOR	19.1589	3313994	322969
KOR632	KOR	19.149	3303049	323709
KOR633	KOR	19.1478	3317810	324975
KOR634	KOR	19.1405	3326924	326765
KOR635	KOR	19.1379	3315610	324966
KOR636	KOR	19.1349	3318346	323224
KOR637	KOR	19.1289	3298081	323622
KOR638	KOR	19.128	3294980	325139
KOR639	KOR	19.122	3325407	326619
KOR640	KOR	19.1175	3302899	326913
KOR641	KOR	19.1101	3301749	322278
KOR642	KOR	19.0946	3311448	321591
KOR643	KOR	19.09	3328657	324516
KOR644	KOR	19.0791	3330157	327279
KOR645	KOR	19.0727	3303150	323213
KOR646	KOR	19.0675	3310737	323835
KOR647	KOR	19.0537	3286626	323639
KOR648	KOR	19.031	3314675	325257
KOR649	KOR	19.0199	3316628	327204
KOR650	KOR	19.0159	3307410	325213
KOR651	KOR	19.0117	3312009	325293
KOR652	KOR	19.0052	3323010	326886
KOR653	KOR	19.0042	3292124	323599
KOR654	KOR	18.9968	3323023	323207
KOR655	KOR	18.9937	3299598	323698
KOR656	KOR	18.9906	3321343	326705
KOR657	KOR	18.989	3310820	322682
KOR658	KOR	18.9784	3329768	327325
KOR659	KOR	18.977	3293427	325242
KOR660	KOR	18.9618	3291445	324159
KOR661	KOR	18.9557	3302949	323555
KOR662	KOR	18.9548	3289620	322167
KOR663	KOR	18.9478	3311800	322772
KOR664	KOR	18.9305	3297770	326348
KOR665	KOR	18.9218	3313444	325015
KOR666	KOR	18.9188	3316731	325981
KOR667	KOR	18.9107	3308285	323431
KOR668	KOR	18.9056	3296143	323189
KOR669	KOR	18.8903	3290983	322712
KOR670	KOR	18.8898	3318735	325295
KOR671	KOR	18.8817	3306962	324285
KOR672	KOR	18.876	3301187	326790
KOR673	KOR	18.8685	3339617	327770
KOR674	KOR	18.8621	3311984	323682
KOR675	KOR	18.8601	3316482	324465
KOR676	KOR	18.8588	3294000	326547
KOR677	KOR	18.8539	3305412	322267
KOR678	KOR	18.844	3308390	325420
KOR679	KOR	18.8394	3307185	323509
KOR680	KOR	18.8349	3307335	326168
KOR681	KOR	18.8326	3306616	323900
KOR682	KOR	18.8238	3325422	322737
KOR683	KOR	18.8191	3318213	325968
KOR684	KOR	18.8124	3334399	325312
KOR685	KOR	18.7879	3323988	326100
KOR686	KOR	18.7864	3322178	326842
KOR687	KOR	18.7809	3307583	323678
KOR688	KOR	18.7799	3310034	322614
KOR689	KOR	18.7694	3296531	321507
KOR690	KOR	18.7514	3333288	325782
KOR691	KOR	18.7368	3314985	322970
KOR692	KOR	18.7353	3311517	325560
KOR693	KOR	18.7217	3312005	324755
KOR694	KOR	18.7084	3322564	324695
KOR695	KOR	18.7046	3299429	323151
KOR696	KOR	18.7031	3317058	323987
KOR697	KOR	18.7026	3323801	325342
KOR698	KOR	18.7017	3307284	324061
KOR699	KOR	18.7011	3304087	324192
KOR700	KOR	18.6769	3319543	325913
KOR701	KOR	18.6713	3341942	325903
KOR702	KOR	18.6694	3301363	325201
KOR703	KOR	18.6463	3297028	319596
KOR704	KOR	18.6404	3315914	324911
KOR705	KOR	18.6362	3321068	324124
KOR706	KOR	18.6164	3304071	323771
KOR707	KOR	18.5853	3313584	324191
KOR708	KOR	18.5842	3342204	325550
KOR709	KOR	18.5792	3287260	323848
KOR710	KOR	18.577	3319329	324124
KOR711	KOR	18.577	3302948	326723
KOR712	KOR	18.5757	3310927	325013
KOR713	KOR	18.5726	3301406	323192
KOR714	KOR	18.5572	3301228	321434
KOR715	KOR	18.546	3313532	323811
KOR716	KOR	18.5306	3303450	323444
KOR717	KOR	18.5286	3307229	321342
KOR718	KOR	18.4827	3319948	324123
KOR719	KOR	18.4759	3290624	321898
KOR720	KOR	18.4503	3324736	326191
KOR721	KOR	18.4472	3287582	320752
KOR722	KOR	18.4466	3314433	323768
KOR723	KOR	18.4394	3293332	324062
KOR724	KOR	18.423	3293621	322816
KOR725	KOR	18.3999	3296181	323822
KOR726	KOR	18.3895	3311275	324442
KOR727	KOR	18.3846	3333606	322526
KOR728	KOR	18.3839	3300784	323878
KOR729	KOR	18.3644	3333369	326007
KOR730	KOR	18.3607	3306247	323106
KOR731	KOR	18.3525	3310027	325313
KOR732	KOR	18.3495	3343113	327693
KOR733	KOR	18.3355	3293583	323374
KOR734	KOR	18.3316	3314165	322398
KOR735	KOR	18.3272	3299785	323971
KOR736	KOR	18.3041	3321908	324200
KOR737	KOR	18.2799	3318479	323443
KOR738	KOR	18.2729	3306377	325641
KOR739	KOR	18.2706	3317468	323110
KOR740	KOR	18.2652	3323302	325079
KOR741	KOR	18.259	3335190	326445
KOR742	KOR	18.255	3330532	324940
KOR743	KOR	18.2339	3297506	321193
KOR744	KOR	18.2319	3306204	323763
KOR745	KOR	18.228	3315873	322345
KOR746	KOR	18.2217	3328364	324688
KOR747	KOR	18.2203	3299942	321073
KOR748	KOR	18.1956	3292869	323091
KOR749	KOR	18.1745	3319866	323718
KOR750	KOR	18.1605	3305822	322789
KOR751	KOR	18.1592	3306371	323398
KOR752	KOR	18.1289	3301097	324860
KOR753	KOR	18.1284	3316210	325165
KOR754	KOR	18.1266	3312155	323233
KOR755	KOR	18.1136	3304195	323591
KOR756	KOR	18.1106	3295261	324814
KOR757	KOR	18.0917	3325940	325433
KOR758	KOR	18.0889	3305527	323653
KOR759	KOR	18.0876	3332701	325173
KOR760	KOR	18.0829	3324187	323481
KOR761	KOR	18.0401	3279521	322605
KOR762	KOR	18.0341	3321103	323212
KOR763	KOR	17.9796	3295626	322233
KOR764	KOR	17.9782	3309833	325180
KOR765	KOR	17.9719	3320870	326645
KOR766	KOR	17.9692	3315756	324042
KOR767	KOR	17.9442	3300766	326020
KOR768	KOR	17.9402	3314258	324643
KOR769	KOR	17.9385	3303208	323241
KOR770	KOR	17.9167	3295723	325441
KOR771	KOR	17.9158	3303074	322285
KOR772	KOR	17.9102	3296752	319706
KOR773	KOR	17.8498	3318216	321812
KOR774	KOR	17.8429	3331378	324634
KOR775	KOR	17.8209	3294415	321373
KOR776	KOR	17.8027	3328349	327711
KOR777	KOR	17.7955	3328126	322811
KOR778	KOR	17.7883	3312457	321480
KOR779	KOR	17.7836	3307016	323473
KOR780	KOR	17.7666	3303541	324363
KOR781	KOR	17.7628	3313555	327162
KOR782	KOR	17.7351	3324506	324157
KOR783	KOR	17.7255	3298971	323899
KOR784	KOR	17.6695	3300882	323599
KOR785	KOR	17.6529	3302946	324758
KOR786	KOR	17.6493	3305188	322687
KOR787	KOR	17.6154	3316118	323073
KOR788	KOR	17.602	3325503	325155
KOR789	KOR	17.5425	3308506	324231
KOR790	KOR	17.5227	3285288	322088
KOR791	KOR	17.5004	3322454	322435
KOR792	KOR	17.4792	3310955	323041
KOR793	KOR	17.4351	3318318	325087
KOR794	KOR	17.3839	3308441	324767
KOR795	KOR	17.3428	3315317	323995
KOR796	KOR	17.315	3340425	326384
KOR797	KOR	17.3048	3301369	323281
KOR798	KOR	17.302	3304365	324119
KOR799	KOR	17.2623	3320642	322402
KOR800	KOR	17.2472	3289997	322865
KOR801	KOR	17.1642	3308347	323521
KOR802	KOR	17.1577	3290392	324758
KOR803	KOR	17.1221	3314068	323513
KOR804	KOR	17.1045	3308541	323804
KOR805	KOR	17.1003	3288926	322168
KOR806	KOR	17.0783	3309922	323577
KOR807	KOR	17.0696	3317693	324196
KOR808	KOR	17.0696	3334068	324054
KOR809	KOR	17.0526	3299933	322123
KOR810	KOR	17.0495	3322398	322766
KOR811	KOR	17.041	3310307	326389
KOR812	KOR	17.041	3305606	322365
KOR813	KOR	17.039	3318902	323734
KOR814	KOR	17.0291	3305394	323167
KOR815	KOR	16.9451	3312417	321360
KOR816	KOR	16.8842	3320206	322596
KOR817	KOR	16.8153	3312552	325642
KOR818	KOR	16.8107	3331048	324961
KOR819	KOR	16.6808	3303844	324520
KOR820	KOR	16.6203	3303685	326444
KOR821	KOR	16.6016	3295847	324587
KOR822	KOR	16.5502	3320089	322599
KOR823	KOR	16.5458	3300061	323224
KOR824	KOR	16.5069	3314438	325142
KOR825	KOR	16.3807	3299030	322817
KOR826	KOR	16.3516	3323949	324240
KOR827	KOR	16.333	3294893	321766
KOR828	KOR	16.2648	3324005	323390
KOR829	KOR	16.2243	3309301	322494
KOR830	KOR	16.2165	3282904	321504
KOR831	KOR	16.1998	3312564	323412
KOR832	KOR	16.179	3329171	324402
KOR833	KOR	16.1363	3307223	320483
KOR834	KOR	16.0512	3334643	323947
KOR835	KOR	16.0412	3321518	322578
KOR836	KOR	15.9038	3297439	320372
KOR837	KOR	15.898	3298505	322148
KOR838	KOR	15.8203	3307071	322518
KOR839	KOR	15.7565	3306408	322958
KOR840	KOR	15.6743	3308226	322822
KOR841	KOR	15.4469	3323791	323314
KOR842	KOR	15.4241	3312110	324134
KOR843	KOR	15.2198	3296204	320356
KOR844	KOR	15.0211	3301694	321040
KOR845	KOR	14.8427	3311981	321509
KOR846	KOR	14.7246	3292849	321922
KOR847	KOR	14.609	3321686	325907
KOR848	KOR	14.2751	3314153	323206
KOR849	KOR	13.9411	3307590	324987
KOR850	KOR	13.068	3301371	320611
MNG01	MNG	43.9748	3343756	324320
MNG02	MNG	40.4635	3295489	321331
MNG03	MNG	40.2694	3353080	325794
MNG04	MNG	40.1986	3330995	322574
MNG05	MNG	39.6353	3338225	324627
MNG06	MNG	39.4057	3348117	326150
MNG07	MNG	39.1516	3331927	326816
MNG08	MNG	39.1495	3323923	322921
MNG09	MNG	38.5917	3325871	326905
MNG10	MNG	38.5041	3325623	326562
MNG11	MNG	38.3222	3361928	327657
MNG12	MNG	37.9229	3335639	324246
MNG13	MNG	37.5894	3306681	324312
MNG14	MNG	37.4778	3365082	326441
MNG15	MNG	37.2846	3351415	326473
MNG16	MNG	37.2598	3348262	325393
MNG17	MNG	37.1083	3340392	326496
MNG18	MNG	36.7954	3340945	326055
MNG19	MNG	36.721	3345237	326589
MNG20	MNG	36.3849	3311591	322930
MNG21	MNG	36.3381	3354326	327011
MNG22	MNG	36.0536	3352945	325538
MNG23	MNG	36.0533	3330643	323341
MNG24	MNG	35.7298	3328505	322963
MNG25	MNG	35.3804	3344079	325176
MNG26	MNG	35.0215	3322504	325551
MNG27	MNG	34.9848	3344754	323751
MNG28	MNG	34.9398	3333848	324842
MNG29	MNG	34.821	3319683	324089
MNG30	MNG	34.6432	3346462	325577
MNG31	MNG	34.6062	3302344	319637
MNG32	MNG	34.5967	3319938	322750
MNG33	MNG	34.5746	3338911	324381
MNG34	MNG	34.5181	3323154	322919
MNG35	MNG	34.5011	3337458	324504
MNG36	MNG	34.4364	3343165	325404
MNG37	MNG	34.2694	3346046	325620
MNG38	MNG	34.1495	3347227	326853
MNG39	MNG	34.1379	3322044	323211
MNG40	MNG	34.1366	3334227	323455
MNG41	MNG	34.0981	3328431	323369
MNG42	MNG	34.0612	3319271	324311
MNG43	MNG	33.7494	3325877	324926
MNG44	MNG	33.6634	3308980	322426
MNG45	MNG	33.628	3344763	327095
MNG46	MNG	33.4227	3349228	326487
MNG47	MNG	33.3023	3335266	325474
MNG48	MNG	33.2617	3313820	322336
MNG49	MNG	33.2158	3349852	327882
MNG50	MNG	33.2136	3339246	324195
MNG51	MNG	33.2106	3322519	322572
MNG52	MNG	33.2056	3322870	323169
MNG53	MNG	33.1422	3348068	324234
MNG54	MNG	33.1309	3327320	325960
MNG55	MNG	33.0989	3342143	325055
MNG56	MNG	33.0746	3327560	324610
MNG57	MNG	33.053	3341533	324671
MNG58	MNG	33.0288	3347510	324944
MNG59	MNG	32.948	3352699	323066
MNG60	MNG	32.9467	3353056	325338
MNG61	MNG	32.8626	3341811	324318
MNG62	MNG	32.8197	3320077	326235
MNG63	MNG	32.6733	3347230	326882
MNG64	MNG	32.6138	3326661	324471
MNG65	MNG	32.5399	3274459	315796
MNG66	MNG	32.52	3274095	316293
MNG67	MNG	32.4508	3349870	323865
MNG68	MNG	32.4408	3329887	327066
MNG69	MNG	32.3375	3354013	324602
MNG70	MNG	32.2172	3328965	322395
MNG71	MNG	32.2136	3333500	326193
MNG72	MNG	32.1365	3348988	324053
MNG73	MNG	32.1146	3315725	322746
MNG74	MNG	32.1141	3356706	326314
MNG75	MNG	32.107	3359502	327085
MNG76	MNG	32.0988	3356584	326978
MNG77	MNG	32.0877	3273563	314691
MNG78	MNG	32.0675	3319615	323314
MNG79	MNG	32.0546	3355208	324811
MNG80	MNG	32.044	3352694	325579
MNG81	MNG	31.963	3332613	327273
MNG82	MNG	31.9062	3328882	324751
MNG83	MNG	31.8602	3329875	325319
MNG84	MNG	31.8291	3339231	324549
MNG85	MNG	31.7618	3343902	324862
MNG86	MNG	31.7487	3320698	323073
MNG87	MNG	31.731	3325826	326251
MNG88	MNG	31.689	3221716	307482
MNG89	MNG	31.6756	3312947	321635
MNG90	MNG	31.6511	3334777	325791
MNG91	MNG	31.62	3360317	326324
MNG92	MNG	31.5037	3308595	321559
MNG93	MNG	31.4295	3338988	326154
MNG94	MNG	31.4122	3314256	323127
MNG95	MNG	31.3296	3327079	323309
MNG96	MNG	31.2044	3349665	326917
MNG97	MNG	31.146	3340420	326765
MNG98	MNG	31.1236	3316814	325002
MNG99	MNG	31.0934	3313535	321499
MNG100	MNG	31.0885	3292131	316426
MNG101	MNG	30.9249	3359709	324430
MNG102	MNG	30.9065	3342786	326236
MNG103	MNG	30.8844	3254653	311429
MNG104	MNG	30.8519	3332602	324674
MNG105	MNG	30.7681	3317715	325690
MNG106	MNG	30.7364	3314812	322122
MNG107	MNG	30.7322	3333116	323467
MNG108	MNG	30.5681	3333311	325468
MNG109	MNG	30.5418	3346027	323563
MNG110	MNG	30.4978	3322360	322467
MNG111	MNG	30.4842	3330767	325489
MNG112	MNG	30.4504	3343273	325975
MNG113	MNG	30.4042	3348124	324902
MNG114	MNG	30.3003	3319473	322957
MNG115	MNG	30.2131	3337551	324629
MNG116	MNG	30.1598	3340452	324305
MNG117	MNG	30.1278	3337253	326129
MNG118	MNG	30.1255	3304513	319614
MNG119	MNG	30.0675	3303836	317111
MNG120	MNG	30.0592	3340125	324403
MNG121	MNG	30.0044	3321517	321671
MNG122	MNG	29.8392	3321788	321992
MNG123	MNG	29.7959	3317928	322612
MNG124	MNG	29.7363	3350455	325460
MNG125	MNG	29.7158	3355844	324396
MNG126	MNG	29.5091	3324854	322490
MNG127	MNG	29.1813	3351346	325884
MNG128	MNG	29.1239	3359599	325982
MNG129	MNG	29.0902	3334322	324353
MNG130	MNG	28.8819	3336784	323636
MNG131	MNG	28.8356	3340684	327949
MNG132	MNG	28.4889	3343405	324726
MNG133	MNG	28.3116	3330807	324348
MNG134	MNG	26.5453	3325433	321965
MNG135	MNG	25.728	3356886	326122
MNG136	MNG	25.2041	3245510	309760
MNG137	MNG	25.0505	3319905	320823
MNG138	MNG	24.0942	3330331	322963
MNG139	MNG	23.6229	3322728	322534
MNG140	MNG	23.4489	3342719	325231
MNG141	MNG	23.1948	3333836	323384
MNG142	MNG	22.8352	3353574	324273
MNG143	MNG	22.5658	3354336	323692
MNG144	MNG	22.4924	3349407	322824
MNG145	MNG	22.2673	3337882	323113
MNG146	MNG	21.9936	3409423	328366
MNG147	MNG	21.9587	3347532	325442
MNG148	MNG	21.419	3321788	321256
MNG149	MNG	21.2016	3335817	323325
MNG150	MNG	21.1531	3377028	326796
MNG151	MNG	21.1264	3370920	327032
MNG152	MNG	20.9035	3342624	322034
MNG153	MNG	20.7787	3356466	326026
MNG154	MNG	20.7262	3332517	320920
MNG155	MNG	20.5552	3365140	325685
MNG156	MNG	20.4758	3323895	322051
MNG157	MNG	20.3513	3360741	323566
MNG158	MNG	20.3133	3360721	324127
MNG159	MNG	20.2405	3408203	329138
MNG160	MNG	20.2116	3332847	324727
MNG161	MNG	20.12	3355659	322912
MNG162	MNG	20.0561	3356776	325974
MNG163	MNG	20.042	3317814	323461
MNG164	MNG	20.0307	3347961	325488
MNG165	MNG	19.9477	3321353	321160
MNG166	MNG	19.9078	3330627	322039
MNG167	MNG	19.8465	3333253	321680
MNG168	MNG	19.7994	3352422	324831
MNG169	MNG	19.7549	3331588	320945
MNG170	MNG	19.7242	3347981	322560
MNG171	MNG	19.6465	3354551	326145
MNG172	MNG	19.561	3335742	321238
MNG173	MNG	19.5337	3270709	318754
MNG174	MNG	19.503	3349426	324708
MNG175	MNG	19.4424	3350241	324103
MNG176	MNG	19.419	3341740	324190
MNG177	MNG	19.4048	3333154	321687
MNG178	MNG	19.4025	3355790	324700
MNG179	MNG	19.4008	3353818	322960
MNG180	MNG	19.2269	3314475	321755
MNG181	MNG	19.2069	3358055	323573
MNG182	MNG	19.1619	3357431	322776
MNG183	MNG	19.134	3358004	326001
MNG184	MNG	19.1032	3343408	324069
MNG185	MNG	19.0981	3342436	322665
MNG186	MNG	19.0733	3256658	311984
MNG187	MNG	19.0523	3335827	320155
MNG188	MNG	18.9966	3343163	323400
MNG189	MNG	18.9946	3343530	325538
MNG190	MNG	18.988	3353493	325275
MNG191	MNG	18.986	3278010	314849
MNG192	MNG	18.9832	3336798	321625
MNG193	MNG	18.948	3344021	323275
MNG194	MNG	18.9259	3343881	322305
MNG195	MNG	18.924	3342988	323581
MNG196	MNG	18.9176	3332613	322585
MNG197	MNG	18.8803	3358441	325346
MNG198	MNG	18.8786	3317044	322396
MNG199	MNG	18.8485	3358600	325697
MNG200	MNG	18.8416	3344011	324502
MNG201	MNG	18.8374	3334426	321652
MNG202	MNG	18.8276	3284349	315611
MNG203	MNG	18.7969	3344744	324015
MNG204	MNG	18.7663	3335693	323914
MNG205	MNG	18.7579	3348786	324592
MNG206	MNG	18.7417	3362544	325787
MNG207	MNG	18.6382	3330280	322622
MNG208	MNG	18.6333	3342549	325908
MNG209	MNG	18.6251	3344429	321883
MNG210	MNG	18.6163	3352874	324400
MNG211	MNG	18.565	3347627	322661
MNG213	MNG	18.4808	3348429	323926
MNG214	MNG	18.4603	3349239	323731
MNG215	MNG	18.3883	3352956	324344
MNG216	MNG	18.3445	3338809	320352
MNG217	MNG	18.3303	3358574	324803
MNG218	MNG	18.2363	3344706	321189
MNG219	MNG	18.2114	3346838	323297
MNG220	MNG	18.1667	3340558	322466
MNG221	MNG	18.1611	3348486	324318
MNG222	MNG	18.1599	3358045	322974
MNG223	MNG	18.1212	3329220	321285
MNG224	MNG	18.0538	3323575	323614
MNG225	MNG	18.0496	3339845	321029
MNG226	MNG	17.9986	3346198	321356
MNG227	MNG	17.974	3331399	322776
MNG228	MNG	17.9322	3333925	322960
MNG229	MNG	17.9144	3356671	324994
MNG230	MNG	17.9014	3335724	320997
MNG231	MNG	17.8962	3338883	322164
MNG232	MNG	17.8945	3352217	322416
MNG233	MNG	17.8908	3339094	324074
MNG234	MNG	17.8358	3333855	320797
MNG235	MNG	17.708	3356031	323619
MNG236	MNG	17.706	3335796	322702
MNG237	MNG	17.6473	3358488	323949
MNG238	MNG	17.5579	3342629	324665
MNG239	MNG	17.5514	3341145	321451
MNG240	MNG	17.5093	3350361	324422
MNG241	MNG	17.4806	3273913	311488
MNG242	MNG	17.4309	3344624	322857
MNG243	MNG	17.4015	3342046	323781
MNG244	MNG	17.3993	3327803	319374
MNG245	MNG	17.3646	3350584	324499
MNG246	MNG	17.3289	3351688	323148
MNG247	MNG	17.328	3310120	320109
MNG248	MNG	17.209	3326829	320550
MNG249	MNG	17.17	3346782	322174
MNG250	MNG	17.142	3350304	324764
MNG251	MNG	17.1278	3351091	323671
MNG252	MNG	17.1269	3333121	323014
MNG253	MNG	17.1203	3339373	324853
MNG254	MNG	17.0775	3349161	323803
MNG255	MNG	17.0728	3337147	320779
MNG256	MNG	17.0423	3319003	322308
MNG257	MNG	17.0065	3346448	323492
MNG258	MNG	16.9566	3341639	321630
MNG259	MNG	16.9518	3330152	320276
MNG260	MNG	16.949	3328570	320660
MNG261	MNG	16.9418	3333198	319796
MNG262	MNG	16.8713	3201435	305626
MNG263	MNG	16.8561	3317023	318246
MNG264	MNG	16.8229	3336748	322621
MNG265	MNG	16.8192	3335434	322647
MNG266	MNG	16.7956	3258803	309955
MNG267	MNG	16.7704	3340643	322499
MNG268	MNG	16.7326	3350124	322389
MNG269	MNG	16.7302	3336238	322965
MNG270	MNG	16.7126	3336812	322271
MNG271	MNG	16.7102	3320045	321299
MNG272	MNG	16.6521	3321547	320287
MNG273	MNG	16.6164	3328132	321098
MNG274	MNG	16.5932	3322117	323207
MNG275	MNG	16.5229	3335238	321188
MNG276	MNG	16.5094	3359317	323637
MNG277	MNG	16.5002	3349318	321404
MNG278	MNG	16.4306	3365613	324090
MNG279	MNG	16.391	3350893	324510
MNG280	MNG	16.3392	3349182	323201
MNG281	MNG	16.2865	3355622	324722
MNG282	MNG	16.2745	3340100	322438
MNG283	MNG	16.247	3310289	319675
MNG284	MNG	16.2431	3323775	320883
MNG285	MNG	16.2391	3345471	322135
MNG286	MNG	16.2327	3356893	324293
MNG287	MNG	16.1877	3361466	323735
MNG288	MNG	16.183	3327788	322113
MNG289	MNG	16.1803	3358866	323445
MNG290	MNG	16.1703	3351161	322623
MNG291	MNG	16.1549	3341847	322680
MNG292	MNG	16.1336	3328247	322753
MNG293	MNG	16.1274	3329352	322045
MNG294	MNG	16.0829	3352478	322666
MNG295	MNG	16.0256	3353211	324297
MNG296	MNG	16.0132	3330724	321224
MNG297	MNG	16.0097	3329028	321600
MNG298	MNG	15.9642	3341953	322944
MNG299	MNG	15.9632	3326987	319284
MNG300	MNG	15.9294	3349105	324285
MNG301	MNG	15.923	3323493	319410
MNG302	MNG	15.8833	3352531	322518
MNG303	MNG	15.86	3344303	321943
MNG304	MNG	15.8472	3320764	319457
MNG305	MNG	15.8308	3335644	321689
MNG306	MNG	15.8282	3332841	320802
MNG307	MNG	15.7518	3344472	323627
MNG308	MNG	15.7499	3347691	323174
MNG309	MNG	15.7349	3320026	322357
MNG310	MNG	15.702	3318084	322242
MNG311	MNG	15.6659	3321971	321089
MNG312	MNG	15.6024	3347212	323376
MNG313	MNG	15.5957	3337192	321700
MNG314	MNG	15.5926	3345456	323185
MNG315	MNG	15.5383	3331497	320650
MNG316	MNG	15.477	3347496	321533
MNG317	MNG	15.4747	3344766	323490
MNG318	MNG	15.4477	3327212	321580
MNG319	MNG	15.4043	3335213	321146
MNG320	MNG	15.3475	3333165	322319
MNG321	MNG	15.3384	3345873	323599
MNG322	MNG	15.3374	3321776	320559
MNG323	MNG	15.3352	3333121	322672
MNG324	MNG	15.3311	3343293	321936
MNG325	MNG	15.3243	3325929	320600
MNG326	MNG	15.3221	3317669	320895
MNG327	MNG	15.322	3311062	320508
MNG328	MNG	15.2878	3334344	321023
MNG329	MNG	15.2528	3280946	312660
MNG330	MNG	15.2354	3341709	322929
MNG331	MNG	15.2201	3322356	320528
MNG332	MNG	15.2038	3374478	323850
MNG333	MNG	15.1907	3322092	321971
MNG334	MNG	15.1356	3341765	320772
MNG335	MNG	15.1324	3333834	321940
MNG336	MNG	15.1323	3352170	322554
MNG337	MNG	15.1274	3207748	303133
MNG338	MNG	15.0692	3351594	321023
MNG339	MNG	15.0661	3346608	324018
MNG340	MNG	15.063	3322416	319710
MNG341	MNG	15.0181	3315884	320438
MNG342	MNG	14.9317	3335769	321746
MNG343	MNG	14.8429	3330094	320401
MNG344	MNG	14.8173	3340964	322761
MNG345	MNG	14.8039	3334890	322258
MNG346	MNG	14.7924	3358953	322310
MNG347	MNG	14.7605	3326513	320846
MNG348	MNG	14.7395	3331409	322082
MNG349	MNG	14.727	3322271	319825
MNG350	MNG	14.694	3335361	322184
MNG351	MNG	14.6737	3339396	322003
MNG352	MNG	14.6143	3327311	322982
MNG353	MNG	14.5739	3309378	320691
MNG354	MNG	14.553	3338052	322969
MNG355	MNG	14.5375	3354005	324005
MNG356	MNG	14.448	3340646	324258
MNG357	MNG	14.4192	3329383	322545
MNG358	MNG	14.4055	3329729	322281
MNG359	MNG	14.3949	3339483	322112
MNG360	MNG	14.3558	3330762	322508
MNG361	MNG	14.3185	3342248	322158
MNG362	MNG	14.3125	3316991	321315
MNG363	MNG	14.3021	3360917	324309
MNG364	MNG	14.2156	3341816	322864
MNG365	MNG	14.1742	3341441	323280
MNG366	MNG	14.1234	3341852	321813
MNG367	MNG	14.0515	3320000	320499
MNG368	MNG	13.9855	3319961	320645
MNG369	MNG	13.9539	3330220	320964
MNG370	MNG	13.9113	3324719	321201
MNG371	MNG	13.9017	3322439	322765
MNG373	MNG	13.8587	3333527	320573
MNG374	MNG	13.7844	3323917	320020
MNG375	MNG	13.7651	3312891	319366
MNG376	MNG	13.7015	3330986	321396
MNG377	MNG	13.6965	3318666	320381
MNG378	MNG	13.6915	3346165	322772
MNG379	MNG	13.6705	3324244	320575
MNG380	MNG	13.6495	3341619	322255
MNG381	MNG	13.637	3334457	322210
MNG382	MNG	13.5629	3346254	322781
MNG383	MNG	13.5282	3316760	319616
MNG384	MNG	13.4873	3331575	321679
MNG385	MNG	13.3177	3335326	322397
MNG386	MNG	13.0666	3325697	320986
Average		24.8057	3.31622e+06	323245

## Sheet: Table S2
Table S2. Variant accuracy.
Sample ID	Accuracy	Precision	Recall	True positive	True negative	False positive	False negative
Average	0.995575	0.992765	0.992272	973768	2.3294e+06	7096.02	7583.8
HG00418	0.995469	0.992717	0.991986	976177	2329727	7162	7886
HG00421	0.995557	0.99288	0.992067	971328	2329566	6965	7767
HG00422	0.996287	0.993906	0.993547	976856	2332488	5989	6345
HG00427	0.995426	0.992666	0.991893	974443	2325578	7199	7964
HG00428	0.996334	0.993916	0.993629	971517	2337743	5947	6229
HG00436	0.995489	0.993074	0.991676	974084	2329670	6794	8176
HG00437	0.996221	0.993879	0.993318	973188	2333269	5994	6547
HG00442	0.995518	0.992884	0.991923	971360	2331796	6962	7910
HG00443	0.995996	0.993492	0.992936	973032	2334114	6374	6922
HG00448	0.995712	0.992875	0.992648	975904	2328851	7003	7228
HG00472	0.995517	0.992407	0.99244	974863	2330544	7459	7426
HG00473	0.995631	0.993341	0.991952	977246	2322692	6551	7929
HG00475	0.995559	0.992718	0.992278	975422	2330166	7155	7591
HG00476	0.996304	0.993852	0.993669	976971	2330488	6044	6225
HG00478	0.99545	0.992634	0.991951	972512	2332782	7217	7891
HG00479	0.995516	0.992521	0.992297	970843	2326293	7316	7536
HG00500	0.995411	0.992774	0.991741	975553	2327228	7101	8124
HG00513	0.995879	0.993529	0.992557	975716	2328454	6355	7317
HG00524	0.995299	0.992332	0.991744	971314	2329632	7506	8086
HG00525	0.995607	0.992934	0.992176	972410	2333494	6920	7668
HG00530	0.995594	0.993115	0.992001	975887	2331130	6766	7869
HG00531	0.996085	0.993484	0.993268	972794	2327605	6380	6593
HG00533	0.995717	0.993331	0.992179	972744	2328315	6531	7668
HG00534	0.996052	0.993499	0.99318	977711	2330591	6398	6714
HG00536	0.99549	0.992926	0.991831	973356	2327336	6935	8017
HG00537	0.994376	0.99131	0.989651	969825	2326335	8502	10142
HG00542	0.995396	0.992434	0.99196	971271	2331316	7405	7872
HG00556	0.995639	0.993055	0.992159	972199	2334171	6799	7683
HG00557	0.996126	0.994152	0.992782	976814	2326670	5746	7102
HG00580	0.995677	0.992938	0.992481	977677	2329419	6953	7407
HG00583	0.99549	0.99247	0.992241	972319	2333991	7377	7603
HG00584	0.995463	0.992348	0.992294	972745	2330246	7501	7554
HG00619	0.995294	0.992024	0.992023	971878	2333529	7814	7815
HG00620	0.995227	0.991738	0.992154	974858	2325594	8121	7709
HG00653	0.99528	0.992407	0.991642	974911	2330427	7459	8217
HG00656	0.995436	0.992665	0.991897	973255	2329486	7192	7951
HG00657	0.99549	0.992311	0.992438	973163	2328015	7541	7415
HG00663	0.994167	0.990645	0.989641	972216	2327058	9181	10177
HG00671	0.995357	0.992123	0.992142	969763	2327571	7699	7681
HG00672	0.995506	0.992746	0.992044	972096	2328557	7103	7796
HG00683	0.995609	0.992937	0.992222	975272	2331132	6937	7645
HG00684	0.996241	0.993929	0.993379	977126	2330907	5968	6513
HG00690	0.99543	0.992681	0.991803	970614	2335126	7156	8022
HG00698	0.995257	0.992812	0.991179	975703	2328300	7064	8683
HG00699	0.995412	0.992251	0.992239	974876	2330946	7613	7625
NA18526	0.99535	0.99209	0.992224	973691	2321109	7763	7631
NA18532	0.995431	0.992441	0.992124	975052	2329067	7427	7740
NA18537	0.995727	0.992702	0.992874	974129	2323987	7161	6991
NA18542	0.995438	0.99247	0.992079	972797	2332775	7381	7767
NA18545	0.995342	0.992556	0.991694	974073	2330424	7305	8158
NA18547	0.995624	0.992304	0.992969	978161	2323593	7586	6926
NA18550	0.995729	0.993014	0.992531	974308	2333242	6854	7332
NA18552	0.99587	0.993288	0.992732	973330	2331137	6577	7126
NA18555	0.99613	0.993834	0.99311	976917	2328126	6061	6778
NA18558	0.995556	0.992379	0.992572	972447	2330436	7468	7277
NA18561	0.995339	0.9926	0.991629	972203	2327802	7248	8207
NA18562	0.995491	0.992375	0.992404	975456	2327315	7495	7466
NA18563	0.995535	0.992319	0.992618	976238	2327707	7557	7260
NA18564	0.995669	0.993033	0.992322	973679	2328778	6831	7534
NA18566	0.99613	0.993609	0.993305	974801	2330041	6270	6570
NA18570	0.995481	0.992491	0.992211	971354	2327026	7349	7625
NA18571	0.996112	0.993487	0.993355	973674	2330340	6383	6513
NA18572	0.995252	0.992348	0.991603	974622	2330468	7515	8253
NA18573	0.995578	0.992643	0.992412	973663	2327326	7216	7445
NA18576	0.996123	0.993753	0.993149	975350	2328143	6131	6728
NA18577	0.996106	0.993672	0.993146	974452	2333113	6206	6725
NA18579	0.995887	0.993597	0.992484	973355	2329911	6273	7371
NA18582	0.995593	0.992619	0.992447	970314	2328266	7215	7385
NA18592	0.995475	0.992502	0.992179	972015	2329358	7343	7662
NA18593	0.995362	0.992107	0.992226	974779	2328367	7755	7637
NA18603	0.995772	0.992754	0.99296	972657	2323314	7099	6896
NA18605	0.995393	0.992519	0.991973	978967	2326958	7379	7922
NA18608	0.995417	0.992268	0.992174	969026	2331176	7551	7643
NA18609	0.995631	0.992793	0.992379	971559	2335643	7053	7461
NA18611	0.995455	0.992219	0.992368	972361	2335622	7625	7478
NA18612	0.995249	0.992237	0.991665	972438	2333359	7608	8173
NA18620	0.99566	0.993189	0.99209	969475	2329241	6648	7730
NA18621	0.995221	0.992123	0.991781	978171	2326831	7766	8106
NA18622	0.994927	0.991844	0.990924	967870	2331410	7959	8865
NA18623	0.99544	0.992516	0.992076	974421	2328562	7348	7783
NA18624	0.995298	0.99257	0.991545	974726	2329274	7296	8312
NA18632	0.995543	0.992481	0.992461	973700	2325991	7377	7396
NA18633	0.995745	0.993193	0.992431	973183	2324315	6670	7422
NA18635	0.995363	0.992274	0.992035	972774	2329770	7574	7810
NA18636	0.995766	0.993207	0.992519	977876	2328485	6688	7371
NA18637	0.995292	0.991744	0.992353	972176	2322631	8093	7492

## Sheet: Table S3
Table S3. Data source for imputation analysis.
Sample ID	Population	Mean depth (X)	Source
AK1	Korean	79.76	Seo et al20
AK3	Korean	28.8	Ju et al19
AK4	Korean	24.94
AK5	Korean	28.81
AK6	Korean	23.74
AK7	Korean	33.56
AK9	Korean	30
AK14	Korean	27.16
AK20	Korean	24.22
SRR2032507	Korean	31.29	Kim et al15
SRR2033866	Korean	31.76
SRR2034616	Korean	30.19
SRR2037081	Korean	36.24
SRR2039178	Korean	34.95
SRR2039204	Korean	32.67
SRR2039466	Korean	35.97
SRR2040551	Korean	33.15
SRR2040554	Korean	31.21
SRR2040555	Korean	30.02
SRR2040556	Korean	37.29
SRR2043003	Korean	37.67
SRR2043004	Korean	38.6
SRR2043029	Korean	33.95
SRR2043032	Korean	37.27
SRR2043970	Korean	38.33
SRR2043971	Korean	38.4
SRR2043972	Korean	38.07
SRR2043973	Korean	34.6
SRR2045859	Korean	38.81
SRR2045860	Korean	39.49
SRR2045861	Korean	38.62
SRR2045863	Korean	37.14
SRR2045974	Korean	38.13
SRR2045975	Korean	40.01
SRR2045976	Korean	34.15
SRR2045977	Korean	36.02
SRR2047080	Korean	40.39
SRR2047081	Korean	41.03
SRR2047082	Korean	36.13
SRR2047083	Korean	40
SRR2050337	Korean	34.34
SRR2050339	Korean	33.13
SRR2050344	Korean	37.2
SRR2052574	Korean	36.47
SRR2053133	Korean	35.54
SRR2054312	Korean	35.68
SRR2054314	Korean	35.41
SRR2054316	Korean	34.59
SRR2054503	Korean	36.95
SRR2054568	Korean	39.5
SRR2054570	Korean	33.02
SRR2054573	Korean	41.04
SRR2054643	Korean	29.37
SRR2054695	Korean	29.61
SRR2068839	Korean	32.97
SRR2069385	Korean	32.38
SRR2069386	Korean	33.3
SRR2069499	Korean	32.89
SRR2069505	Korean	32.61
SRR3138102	Korean	29.27
SRR3138103	Korean	34.26
SRR3138104	Korean	35.18
SRR3138105	Korean	30.38
SRR3138106	Korean	32.41
SRR3138107	Korean	32.93
SRR5279717	Korean	36.99
SRR5282271	Korean	38.64
SRR5282272	Korean	39.7
SRR5282273	Korean	38.82
SRR5282479	Korean	34.73
SRR5282540	Korean	35.49
SRR5282541	Korean	33.68
SRR5282554	Korean	30.32
SRR5282555	Korean	30.89
SRR5282560	Korean	33.45
SRR5282565	Korean	30.54
SRR5282567	Korean	30.47
SRR5282568	Korean	30.96
SRR6660798	Korean	40.91
SRR6660799	Korean	40.07
SRR6660800	Korean	39.49
SRR6660801	Korean	37.78
SRR6660802	Korean	46.92
SRR6660803	Korean	45.76
SRR6660804	Korean	59.99
SRR6660805	Korean	61.61
SRR6660807	Korean	32.31
SRR6660809	Korean	64.06
SRR6660810	Korean	47.03
SRR6660811	Korean	46.35
SRR6660813	Korean	45.28
SRR6660814	Korean	47.11
SRR6660815	Korean	47.69
SRR6660816	Korean	47.63
SRR6660817	Korean	47
SRR6660818	Korean	49.09
SRR6660819	Korean	45.65
SRS2112609	Han	33.32	Lu et al28
SRS2112610	Han	36.8
SRS2112611	Han	35.81
SRS2112612	Han	37.5
SRS2112613	Han	39.21
SRS2112614	Han	37.98
SRS2112615	Han	38.76
SRS2112616	Han	37.87
SRS2112617	Han	38.98
SRS2112618	Han	38.48
SRS2112619	Han	36.85
SRS2112620	Han	40.01
SRS2112621	Han	40.49
SRS2112622	Han	40.75
SRS2112623	Han	41.05
SRS2112624	Han	40.54
SRS2112625	Han	40.81
SRS2112626	Han	40.56
SRS2112627	Han	39.71
SRS2112628	Han	38.69
SRS2112629	Han	40.51
SRS2112630	Han	40.95
SRS2112631	Han	41.18
SRS2112632	Han	41.16
SRS2112633	Han	39.95
SRS2112634	Han	41.11
SRS2112635	Han	40.14
SRS2112636	Han	38.33
SRS2112637	Han	42.32
SRS2112638	Han	42
SRS2112639	Han	41.8
SRS2112640	Han	42.65
SRS2112641	Han	42.68
SRS2112642	Han	41.87
SRS2112643	Han	39.8
HGDP00774	Han	47.13	Cann et al22
HGDP00776	Han	41.32
HGDP00777	Han	39.68
HGDP00779	Han	39.38
HGDP00780	Han	44.47
HGDP00781	Han	43.94
HGDP00782	Han	38.91
HGDP00784	Han	39.55
HGDP00786	Han	41.39
HGDP00811	Han	39.69
HGDP00812	Han	43.51
HGDP00813	Han	38.52
HGDP00814	Han	43.03
HGDP00815	Han	42
HGDP00817	Han	42.97
HGDP00818	Han	39.59
HGDP00819	Han	44.38
HGDP00820	Han	38.27
HGDP00821	Han	42.83
HGDP00822	Han	74.58
HGDP00971	Han	40.73
HGDP00972	Han	38.24
HGDP00973	Han	44.39
HGDP00974	Han	44.08
HGDP00975	Han	42.13
HGDP00976	Han	36.7
HGDP00977	Han	42.85
HGDP01021	Han	39.61
HGDP01023	Han	43.6
HGDP01024	Han	41.32
SRS2112605	Han	33.77
SRS2112606	Han	33.8
SRS2112607	Han	29.9
SRS2112608	Han	33.74
HGDP01287	Northern Han	41.28
HGDP01288	Northern Han	44.36
HGDP01289	Northern Han	40.28
HGDP01290	Northern Han	38.83
HGDP01291	Northern Han	50.16
HGDP01292	Northern Han	38.85
HGDP01293	Northern Han	42.04
HGDP01294	Northern Han	43.07
HGDP01295	Northern Han	43.44
HGDP01296	Northern Han	39.74
HGDP00747	Japanese	36.08
HGDP00748	Japanese	42.51
HGDP00750	Japanese	37.93
HGDP00751	Japanese	43.16
HGDP00752	Japanese	42.24
HGDP00753	Japanese	38.7
HGDP00754	Japanese	41.2
HGDP00755	Japanese	42.8
HGDP00756	Japanese	42.63
HGDP00757	Japanese	42.62
HGDP00758	Japanese	36.86
HGDP00759	Japanese	48.26
HGDP00760	Japanese	35.84
HGDP00761	Japanese	42.53
HGDP00762	Japanese	41.62
HGDP00763	Japanese	41.57
HGDP00764	Japanese	39.73
HGDP00765	Japanese	42.38
HGDP00766	Japanese	38.91
HGDP00767	Japanese	39.94
HGDP00768	Japanese	41.41
HGDP00769	Japanese	49.87
HGDP00771	Japanese	41.77
HGDP00772	Japanese	38.39
HGDP00790	Japanese	46.27
HGDP00791	Japanese	41.75
HGDP00828	Japanese	46.59
HGDP00511	French	38.73
HGDP00512	French	37.19
HGDP00513	French	43.09
HGDP00514	French	38.88
HGDP00515	French	40.25
HGDP00517	French	44.12
HGDP00518	French	41.16
HGDP00519	French	30.07
HGDP00520	French	43.65
HGDP00522	French	38.39
HGDP00523	French	38.89
HGDP00524	French	40.75
HGDP00525	French	41.26
HGDP00531	French	42.43
HGDP00534	French	46.31
HGDP00536	French	46.34
HGDP00537	French	42.21
HGDP00516	French	37.68
HGDP00527	French	37.74
HGDP00528	French	44.65
HGDP00529	French	38.52
HGDP00535	French	37.61
HGDP00538	French	37.7
HGDP00539	French	43.52

## Sheet: Table S4
Table S4. Imputation performance according to types of reference panel.
Cohort	Panel	Imputation accuracy (aggregated R2)												Number of imputed SNP
		0<MAF<0.002	0.002≤MAF<0.005	0.005≤MAF<0.01	0.01≤MAF<0.02	0.02≤MAF<0.05	0.05≤MAF<0.1	0.1≤MAF<0.2	0.2≤MAF<0.3	0.3≤MAF<0.4	0.4≤MAF<0.5	0.5≤MAF≤1		0.7≤R2<0.8	0.8≤R2<0.9	0.9≤R2
KOR	1KGP3	0.634484	0.650536	0.6728	0.714638	0.832577	0.941585	0.977248	0.98604	0.987885	0.988824	0.98679		475346	602461	6656207
	1KGP3 (re-phased)	0.635422	0.655357	0.678906	0.721163	0.837237	0.943332	0.978026	0.986551	0.988387	0.989223	0.987247		525997	650791	6552317
	NARD	0.688516	0.72256	0.732309	0.767632	0.86664	0.954278	0.982598	0.989548	0.991043	0.991664	0.990677		418799	516709	6208397
	NARD (re-phased)	0.795392	0.828199	0.833928	0.855249	0.916416	0.970504	0.988009	0.992224	0.993078	0.9935	0.992733		615889	829310	7361976
	NARD+1KGP3 (re-phased)	0.800193	0.830172	0.835942	0.855967	0.916361	0.970298	0.987904	0.992177	0.993043	0.993447	0.992601		618023	881042	7511378
CHN	1KGP3	0.711187	0.694315	0.677416	0.714926	0.833005	0.938284	0.97429	0.983224	0.985681	0.98686	0.981611		461459	603108	6836755
	1KGP3 (re-phased)	0.695117	0.68526	0.684492	0.733683	0.848992	0.943769	0.97529	0.983285	0.985015	0.98639	0.983449		497468	628264	6644335
	NARD	0.591981	0.647545	0.662706	0.709419	0.831717	0.937552	0.973936	0.983057	0.985662	0.986721	0.980832		321904	434883	6084715
	NARD (re-phased)	0.696451	0.724357	0.731985	0.774517	0.872569	0.952912	0.97976	0.986187	0.987909	0.988818	0.986677		485193	590093	6842105
	NARD+1KGP3 (re-phased)	0.749629	0.746806	0.759953	0.793774	0.881156	0.95528	0.980699	0.986999	0.988762	0.989587	0.985987		537328	670956	6970990
JPN	1KGP3	0.66319	0.735458	0.764847	0.803889	0.884608	0.951158	0.977581	0.984599	0.986366	0.987463	0.986427		247958	400617	6191701
	1KGP3 (re-phased)	0.671006	0.743887	0.774067	0.811116	0.888753	0.953129	0.978518	0.985322	0.986889	0.988004	0.986954		261419	418217	6089905
	NARD	0.72838	0.783236	0.798791	0.829995	0.899019	0.958288	0.981692	0.987701	0.988996	0.990022	0.989709		222439	343005	5683476
	NARD (re-phased)	0.836271	0.883106	0.890728	0.905849	0.941463	0.973999	0.987584	0.991119	0.991786	0.992522	0.992245		250310	407568	6511709
	NARD+1KGP3 (re-phased)	0.842555	0.887164	0.893465	0.907991	0.942594	0.974259	0.987577	0.991076	0.991724	0.992497	0.992089		245796	414965	6578176
